# Supplementary material for: Cost-effectiveness and affordability of community mobilisation through women’s groups and quality improvement in health facilities (MaiKhanda trial) in Malawi
Source: Springer Nature journal article supplement (doi:10.1186/s12962-014-0028-2), 2015-01-09
Supplement: MOESM1 [file 9766092]

## **Additional file 1: Models, Cluster-Level Mortality Data, R Source Code and Output**

This additional file contains the following:

Pages 2-3 and 4-5: the two statistical models (MKmodel\_final and MKmodelFC\_final) for modelling the effects of the community and facility interventions and community and facility interventions combined – see the lines they are referred to in the R Source Code.

Page 6 and Page 7: the two cluster-level mortality datasets, the first, MK.csv, for the community and facility interventions, the two-by-two arm trial [hf denotes cluster (health facility) number; fi = facility intervention; ci = community intervention; urb = urban (1) or rural (0); llw and sal are variables for the two districts the sample was also stratified by; mvital = maternal deaths; bvital = baby deaths (stillbirth or neonatal death); obs = the total number of observations in each cluster]; the second, MKFC.csv, for the combined intervention, the one-arm trial [variables as before; fici = combined facility and community intervention] – see the lines they are referred to in the R Source Code.

Pages 8-10 and 11-21: R Source Code for the main analysis, and the future scenario analysis, respectively.

Pages 22-27, 28-33 and 34-48: R Output for the main analysis, the local life expectancy sensitivity analysis [note that for this analysis the only difference in the R Source file from the main analysis – see pages 8-10 - is that 86.0 and 53.27 are replaced by 45 and 28.1, respectively], and the future scale-up scenarios analysis, respectively.

```

# MKmodel_final

model {
  for (i in 1:length(hf)) {
    # combined baby deaths
    bdeath[i] ~ dbin(b[i],obs[i])
    logit(b[i]) <- alpha0_b + fac[1]*fi[i] + com[1]*ci[i] + strata2[1]*llw[i] +
strata3[1]*sal[i] + urban[1]*urb[i]
    # Maternal deaths
    mvital[i] ~ dbin(m[i],obs[i])
    logit(m[i]) <- alpha0_m + fac[2]*fi[i] + com[2]*ci[i] + strata2[2]*llw[i] +
strata3[2]*sal[i] + urban[2]*urb[i]
  }
  #Blocking of coefficients (Priors)
  fac[1:2] ~ dnorm(mu[1:2],P[1:2,1:2])
  com[1:2] ~ dnorm(mu[1:2],P[1:2,1:2])
  strata2[1:2] ~ dnorm(mu[1:2],P[1:2,1:2])
  strata3[1:2] ~ dnorm(mu[1:2],P[1:2,1:2])
  urban[1:2] ~ dnorm(mu[1:2],P[1:2,1:2])

  # Priors
  alpha0_b ~ dnorm(0.0, 1.0E-6)
  alpha0_m ~ dnorm(0.0, 1.0E-6)

#cost-effectiveness

pop <- 108000 # population of babies and mothers in 2 arms (CI, No CI, FI, no FI) in 2.25
years (1.2m * CBR of 0.04 * 27/12)

bmr_nc <- 0.059443785 # baby mortality rate in No CI arm: 219 SB + 232 NND out of 7587 births
bmr_nf <- 0.061760305 # baby mortality rate in No FI arm: 237 SB + 217 NND out of 7351 births
mmr_nc <- 0.0038223277 # mother mortality rate in No CI arm: 29 MD out of 7587 births
mmr_nf <- 0.0039450415 # mother mortality rate in No FI arm: 29 MD out of 7351 births

bm_nc ~ dbin(bmr_nc,pop) # baby mortality in No CI arm
bm_nf ~ dbin(bmr_nf,pop) # baby mortality in No FI arm
mm_nc ~ dbin(mmr_nc,pop) # mother mortality in No CI arm
mm_nf ~ dbin(mmr_nf,pop) # mother mortality in No FI arm

bs_nc <- pop - bm_nc # baby survivors in No CI arm
bs_nf <- pop - bm_nf # baby survivors in No FI arm
ms_nc <- pop - mm_nc # mother survivors in No CI arm
ms_nf <- pop - mm_nf # mother survivors in No CI arm

ob_nc <- bm_nc / bs_nc # odds of baby death in No CI areas
ob_nf <- bm_nf / bs_nf # odds of baby death in No FI areas
om_nc <- mm_nc / ms_nc # odds of mother death in No CI areas
om_nf <- mm_nf / ms_nf # odds of mother death in No FI areas

orb_c <- exp(com[1]) # Odds Ratio of CI on BMR
orb_f <- exp(fac[1]) # Odds Ratio of FI on BMR
orm_c <- exp(com[2]) # Odds Ratio of CI on MMR
orm_f <- exp(fac[2]) # Odds Ratio of FI on MMR

ob_c <- ob_nc * orb_c # odds of baby death in CI arm (odds in No CI arms * Odds Ratio of CI on
BMR)
ob_f <- ob_nf * orb_f # odds of baby death in FI arm (odds in No FI arms * Odds Ratio of FI on
BMR)
om_c <- om_nc * orm_c # odds of mother death in CI arm (odds in No CI * Odds Ratio of CI on
MMR)
om_f <- om_nf * orm_f # odds of mother death in FI arm (odds in No FI * Odds Ratio of FI on
MMR)

ob_c1 <- ob_c + 1 # odds of baby death in CI areas + 1 (for calculation of survivors in
intervention arm)
ob_f1 <- ob_f + 1 # odds of baby death in FI areas + 1 (for calculation of survivors in
intervention arm)
om_c1 <- om_c + 1 # odds of mother death in CI areas + 1 (for calculation of survivors in
intervention arm)
om_f1 <- om_f + 1 # odds of mother death in FI areas + 1 (for calculation of survivors in
intervention arm)

bs_c <- pop / ob_c1 # baby survivors in CI arm
bs_f <- pop / ob_f1 # baby survivors in FI arm
ms_c <- pop / om_c1 # mother survivors in CI arm

```

```

ms_f <- pop / om_f1 # mother survivors in FI arm

bm_c <- pop - bs_c # baby deaths in CI arm
bm_f <- pop - bs_f # baby deaths in FI arm
mm_c <- pop - ms_c # mother deaths in CI arm
mm_f <- pop - ms_f # mother deaths in FI arm

daly_b <- 86.0 # Disability Adjusted Life Years (DALYs) per baby death
daly_m <- 53.27 # Disability Adjusted Life Years (DALYs) per mother death

lb_c <- bm_nc - bm_c # lives of babies saved (deaths averted) by CI (difference in mortality
between No CI and CI arms)
db_c <- lb_c * daly_b # DALYs of babies averted by CI

lm_c <- mm_nc - mm_c # lives of mothers saved (deaths averted) by CI (difference in
mortality between No CI and CI arms)
dm_c <- lm_c * daly_m # DALYs of mothers averted by CI
d_c <- db_c + dm_c # total DALYs (mothers and babies) averted by CI

lb_f <- bm_nf - bm_f # lives of babies saved (deaths averted) by FI (difference in mortality
between No FI and FI arms)
db_f <- lb_f * daly_b # DALYs of babies averted by FI

lm_f <- mm_nf - mm_f # lives of mothers saved (deaths averted) by FI (difference in
mortality between No FI and FI arms)
dm_f <- lm_f * daly_m # DALYs of mothers averted by FI
d_f <- db_f + dm_f # total DALYs (mothers and babies) averted by FI

}

```

```

# MKmodelFC_final

model {
  for (i in 1:length(hf)) {
    # combined baby deaths
    bdeath[i] ~ dbin(b[i],obs[i])
    logit(b[i]) <- alpha0_b + fc[1]*fici[i] + strata2[1]*llw[i] +
strata3[1]*sal[i] + urban[1]*urb[i]
    # Maternal deaths
    mvital[i] ~ dbin(m[i],obs[i])
    logit(m[i]) <- alpha0_m + fc[2]*fici[i] + strata2[2]*llw[i] +
strata3[2]*sal[i] + urban[2]*urb[i]
  }
  #Blocking of coefficients
  fc[1:2] ~ dnorm(mu[1:2],P[1:2,1:2])
  strata2[1:2] ~ dnorm(mu[1:2],P[1:2,1:2])
  strata3[1:2] ~ dnorm(mu[1:2],P[1:2,1:2])
  urban[1:2] ~ dnorm(mu[1:2],P[1:2,1:2])

  # Priors
  alpha0_b ~ dnorm(0.0, 1.0E-6)
  alpha0_m ~ dnorm(0.0, 1.0E-6)

#cost-effectiveness

pop <- 54000 # population of babies and mothers in 1 control arm in 2.25 years (600,000 * CBR
of 0.04 * 27/12)

bmr_con <- 0.05809575 # baby mortality rate in control arm: 105 SB + 111 NND out of 3718
births
mmr_con <- 0.0040344271 # mother mortality rate in control arm: 15 MD out of 3718 births

bm_con ~ dbin(bmr_con,pop) # baby mortality in control arm
mm_con ~ dbin(mmr_con,pop) # mother mortality in control arm

bs_con <- pop - bm_con # baby survivors in control arm
ms_con <- pop - mm_con # mother survivors in control arm

ob_con <- bm_con / bs_con # odds of baby death in control arm
om_con <- mm_con / ms_con # odds of mother death in control arm

orb_fc <- exp(fc[1]) # Odds Ratio of FICI on BMR
orm_fc <- exp(fc[2]) # Odds Ratio of FICI on MMR

ob_fc <- ob_con * orb_fc # odds of baby death in FICI arm (odds in control arm * Odds Ratio of
FICI on BMR)
om_fc <- om_con * orm_fc # odds of mother death in FICI arm (odds in control arm * Odds Ratio
of FICI on MMR)

ob_fc1 <- ob_fc + 1 # odds of baby death in FICI arm + 1 (for calculation of survivors in
intervention arm)
om_fc1 <- om_fc + 1 # odds of mother death in FICI arm + 1 (for calculation of survivors in
intervention arm)

bs_fc <- pop / ob_fc1 # baby survivors in FICI arm
ms_fc <- pop / om_fc1 # mother survivors in FICI arm

bm_fc <- pop - bs_fc # baby deaths in FICI arm
mm_fc <- pop - ms_fc # mother deaths in FICI arm

daly_b <- 86.0 # Disability Adjusted Life Years (DALYs) per baby death
daly_m <- 53.27 # Disability Adjusted Life Years (DALYs) per mother death

lb_fc <- bm_con - bm_fc # lives of babies saved (deaths averted) by FICI (difference in
mortality between control and FICI arms)
db_fc <- lb_fc * daly_b # DALYs of babies averted by FICI

lm_fc <- mm_con - mm_fc # lives of mothers saved (deaths averted) by FICI (difference in
mortality between control and FICI arms)
dm_fc <- lm_fc * daly_m # DALYs of mothers averted by FICI
d_fc <- db_fc + dm_fc # total DALYs (mothers and babies) averted by FICI

#For Table 1 credible intervals for two-arm FICI:
lb_fc_ <- lb_fc * 2
db_fc_ <- db_fc * 2

```

```
lm_fc_ <- lm_fc * 2  
dm_fc_ <- dm_fc * 2  
d_fc_ <- d_fc * 2  
}
```

MK.csv

| hf | fi | ci | urb | llw | sal | mvital | bdeath | obs |
|----|----|----|-----|-----|-----|--------|--------|-----|
| 1  | 1  | 1  | 0   | 0   | 1   | 2      | 24     | 335 |
| 2  | 0  | 0  | 1   | 1   | 0   | 1      | 8      | 131 |
| 3  | 1  | 0  | 1   | 1   | 0   | 0      | 8      | 224 |
| 4  | 1  | 0  | 0   | 0   | 0   | 2      | 20     | 302 |
| 5  | 1  | 0  | 0   | 1   | 0   | 0      | 7      | 159 |
| 6  | 0  | 0  | 0   | 1   | 0   | 0      | 18     | 258 |
| 7  | 1  | 1  | 0   | 1   | 0   | 0      | 13     | 315 |
| 8  | 0  | 0  | 0   | 1   | 0   | 2      | 4      | 77  |
| 9  | 1  | 0  | 0   | 0   | 1   | 1      | 29     | 463 |
| 10 | 1  | 1  | 0   | 0   | 1   | 1      | 33     | 524 |
| 11 | 1  | 0  | 0   | 0   | 1   | 1      | 24     | 373 |
| 12 | 1  | 0  | 0   | 1   | 0   | 1      | 34     | 359 |
| 13 | 0  | 1  | 0   | 1   | 0   | 1      | 28     | 387 |
| 14 | 1  | 1  | 0   | 1   | 0   | 2      | 24     | 425 |
| 15 | 0  | 0  | 0   | 0   | 0   | 0      | 32     | 397 |
| 16 | 0  | 0  | 0   | 1   | 0   | 1      | 18     | 215 |
| 17 | 0  | 1  | 0   | 1   | 0   | 1      | 22     | 407 |
| 18 | 0  | 0  | 0   | 1   | 0   | 0      | 11     | 123 |
| 19 | 1  | 0  | 0   | 0   | 0   | 3      | 24     | 526 |
| 20 | 0  | 0  | 0   | 0   | 0   | 0      | 16     | 226 |
| 21 | 1  | 0  | 0   | 0   | 0   | 0      | 36     | 456 |
| 22 | 0  | 1  | 0   | 0   | 1   | 1      | 43     | 691 |
| 23 | 0  | 0  | 0   | 1   | 0   | 0      | 12     | 309 |
| 24 | 0  | 0  | 1   | 1   | 0   | 0      | 5      | 132 |
| 25 | 1  | 1  | 0   | 0   | 0   | 0      | 29     | 352 |
| 26 | 0  | 1  | 0   | 0   | 0   | 0      | 14     | 200 |
| 27 | 1  | 1  | 0   | 0   | 1   | 1      | 8      | 268 |
| 28 | 1  | 1  | 0   | 1   | 0   | 1      | 25     | 577 |
| 29 | 1  | 0  | 0   | 0   | 0   | 3      | 17     | 503 |
| 30 | 1  | 0  | 0   | 1   | 0   | 0      | 34     | 474 |
| 31 | 0  | 0  | 0   | 0   | 1   | 3      | 31     | 582 |
| 32 | 0  | 0  | 0   | 0   | 1   | 1      | 34     | 526 |
| 33 | 1  | 1  | 0   | 1   | 0   | 1      | 14     | 215 |
| 34 | 1  | 0  | 0   | 1   | 0   | 0      | 26     | 421 |
| 35 | 1  | 0  | 0   | 1   | 0   | 1      | 8      | 262 |
| 36 | 1  | 1  | 0   | 1   | 0   | 0      | 6      | 188 |
| 37 | 0  | 1  | 0   | 1   | 0   | 0      | 8      | 249 |
| 38 | 0  | 1  | 0   | 1   | 0   | 1      | 23     | 407 |
| 39 | 1  | 1  | 0   | 1   | 0   | 0      | 14     | 204 |
| 40 | 0  | 1  | 0   | 1   | 0   | 0      | 10     | 187 |
| 41 | 0  | 1  | 0   | 0   | 1   | 1      | 32     | 515 |
| 42 | 0  | 0  | 0   | 1   | 0   | 0      | 20     | 268 |
| 43 | 0  | 0  | 0   | 0   | 0   | 0      | 19     | 221 |
| 44 | 0  | 1  | 0   | 0   | 0   | 2      | 11     | 284 |
| 45 | 0  | 0  | 0   | 1   | 0   | 0      | 16     | 371 |
| 46 | 1  | 1  | 0   | 0   | 0   | 3      | 19     | 389 |
| 47 | 1  | 1  | 0   | 0   | 0   | 0      | 20     | 358 |
| 48 | 0  | 0  | 0   | 1   | 0   | 0      | 20     | 323 |
| 49 | 0  | 1  | 0   | 1   | 0   | 0      | 7      | 213 |
| 50 | 1  | 1  | 0   | 1   | 0   | 0      | 19     | 423 |
| 51 | 1  | 0  | 0   | 0   | 1   | 2      | 25     | 490 |
| 52 | 1  | 1  | 0   | 1   | 0   | 0      | 20     | 332 |
| 53 | 0  | 1  | 0   | 0   | 0   | 3      | 24     | 529 |
| 54 | 0  | 1  | 0   | 1   | 0   | 0      | 10     | 148 |
| 55 | 0  | 1  | 0   | 1   | 0   | 0      | 7      | 235 |
| 56 | 1  | 1  | 0   | 0   | 0   | 0      | 12     | 345 |
| 57 | 0  | 0  | 0   | 0   | 1   | 1      | 7      | 146 |
| 58 | 0  | 1  | 0   | 0   | 0   | 1      | 24     | 298 |
| 59 | 0  | 1  | 0   | 0   | 1   | 0      | 17     | 335 |
| 60 | 1  | 0  | 0   | 1   | 0   | 1      | 24     | 327 |
| 61 | 0  | 0  | 0   | 0   | 0   | 1      | 37     | 610 |

MKFC.csv

| strata | arm | hf | fici | urb | llw | sal | mvital | bdeath | obs |
|--------|-----|----|------|-----|-----|-----|--------|--------|-----|
| 3      | 3   | 1  | 1    | 0   | 0   | 1   | 2      | 24     | 335 |
| 2      | 0   | 2  | 0    | 1   | 1   | 0   | 1      | 8      | 131 |
| 2      | 0   | 3  | 0    | 0   | 1   | 0   | 0      | 18     | 258 |
| 2      | 3   | 4  | 1    | 0   | 1   | 0   | 0      | 13     | 315 |
| 2      | 0   | 5  | 0    | 0   | 1   | 0   | 2      | 4      | 77  |
| 3      | 3   | 6  | 1    | 0   | 0   | 1   | 1      | 33     | 524 |
| 2      | 3   | 7  | 1    | 0   | 1   | 0   | 2      | 24     | 425 |
| 1      | 0   | 8  | 0    | 0   | 0   | 0   | 0      | 32     | 397 |
| 2      | 0   | 9  | 0    | 0   | 1   | 0   | 1      | 18     | 215 |
| 2      | 0   | 10 | 0    | 0   | 1   | 0   | 0      | 11     | 123 |
| 1      | 0   | 11 | 0    | 0   | 0   | 0   | 0      | 16     | 226 |
| 2      | 0   | 12 | 0    | 0   | 1   | 0   | 0      | 12     | 309 |
| 2      | 0   | 13 | 0    | 1   | 1   | 0   | 0      | 5      | 132 |
| 1      | 3   | 14 | 1    | 0   | 0   | 0   | 0      | 29     | 352 |
| 3      | 3   | 15 | 1    | 0   | 0   | 1   | 1      | 8      | 268 |
| 2      | 3   | 16 | 1    | 0   | 1   | 0   | 1      | 25     | 577 |
| 3      | 0   | 17 | 0    | 0   | 0   | 1   | 3      | 31     | 582 |
| 3      | 0   | 18 | 0    | 0   | 0   | 1   | 1      | 34     | 526 |
| 2      | 3   | 19 | 1    | 0   | 1   | 0   | 1      | 14     | 215 |
| 2      | 3   | 20 | 1    | 0   | 1   | 0   | 0      | 6      | 188 |
| 2      | 3   | 21 | 1    | 0   | 1   | 0   | 0      | 14     | 204 |
| 2      | 0   | 22 | 0    | 0   | 1   | 0   | 0      | 20     | 268 |
| 1      | 0   | 23 | 0    | 0   | 0   | 0   | 0      | 19     | 221 |
| 2      | 0   | 24 | 0    | 0   | 1   | 0   | 0      | 16     | 371 |
| 1      | 3   | 25 | 1    | 0   | 0   | 0   | 3      | 19     | 389 |
| 1      | 3   | 26 | 1    | 0   | 0   | 0   | 0      | 20     | 358 |
| 2      | 0   | 27 | 0    | 0   | 1   | 0   | 0      | 20     | 323 |
| 2      | 3   | 28 | 1    | 0   | 1   | 0   | 0      | 19     | 423 |
| 2      | 3   | 29 | 1    | 0   | 1   | 0   | 0      | 20     | 332 |
| 1      | 3   | 30 | 1    | 0   | 0   | 0   | 0      | 12     | 345 |
| 3      | 0   | 31 | 0    | 0   | 0   | 1   | 1      | 7      | 146 |
| 1      | 0   | 32 | 0    | 0   | 0   | 0   | 1      | 37     | 610 |

```

setwd("/Users/timothycolbourn/Documents/Papers/MaiKhanda CEA paper/JAGS revised") #set working directory for
saving outputs
sink(file="MaiKhanda_final_log_.txt",split=TRUE)
# MaiKhanda Economic Evaluation v4 in R and JAGS Tim Colbourn 2nd Dec 2014
install.packages("R2jags")
library(R2jags)
install.packages("BCEA")
library(BCEA)

# Community Intervention and Facility Intervention model

mk <- read.csv('MK.csv') # data exported from Stata using 'MK_WinBUGS_final_cluster.do' and also stored in
'MKcluster.txt'

h <- 100
mu <- c(0,0)
P <- (1/h^2)*diag(2)

data <- list(mu=mu,P=P,hf=mk$hf,fi=mk$fi,ci=mk$ci,urb=mk$urb,llw=mk$llw,sal=mk$sal,mvital=mk$mvital,bdeath=mk
$bdeath,obs=mk$obs)

filein <- "/Users/timothycolbourn/Documents/Papers/MaiKhanda CEA paper/JAGS revised/MKmodel_final.txt" #filepath
to text file containing model

inits <- function(){
  list(alpha0_b=rnorm(1), alpha0_m=rnorm(1), strata2=rnorm(2,0,1), strata3=rnorm(2,0,1), urban=rnorm(2,0,1),
  fac=rnorm(2,0,1), com=rnorm(2,0,1))
  } # initial values of paramters

params <-
c("bs_nc","bs_c","ms_nc","ms_c","bs_nf","bs_f","ms_nf","ms_f","orb_c","orm_c","orb_f","orm_f","lb_c","db_c","lm_c",
,"dm_c","lb_f","db_f","lm_f","dm_f","d_c","d_f") #paramters to monitor

model <- jags(data,inits,params,model.file=filein,n.chains=2,n.iter=510000,n.burnin=10000,n.thin=10,DIC=TRUE)

print(model,digits=3,intervals=c(0.025,0.500,0.975))

m <- as.mcmc(model) #converts the object model to an MCMC structure, for plotting and diagnostics
raftery.diag(m) #Raftery-Lewis diagnostic estimates of (for each chain[[1]],[[2]]..) number of iterations
required to estimate 2.5th quantile (=q) of posterior dist, with accuracy (tolerance) r of +/-0.005 and
probability s of 0.95 (defaults)
summary(m) #MCMC error and other indications of convergence. MCMC error is how close posterior SD is to Naive SE.
Time-series SE adjusts Naive SE for autocorrelation; lower values = better convergence

#Health Economic analysis, including EVPPi (p.145-151) - via BCEA package loaded earlier
attach.jags(model)
# Community Intervention (CI) vs Do Nothing
ec <- cc <- matrix(NA,model$BUGSoutput$n.sims,2)
ec <- matrix(c((bs_nc*86.0 + ms_nc*53.27),(bs_c*86.0 + ms_c*53.27)),model$BUGSoutput$n.sims,2) # effects = baby
(times 86.0 DALYs each) survivors + mother survivors (times 53.27 DALYs each) in No CI, baby (times 86.0 DALYs
each) survivors + mother survivors (times 53.27 DALYs each) in CI
cc <- matrix(c(rep(0,model$BUGSoutput$n.sims),rep(5348791,model$BUGSoutput$n.sims)),model$BUGSoutput$n.sims,2) #
costs = cost of do nothing, cost of community intervention
treatsc <- c("do nothing","Community Intervention")
ci <- bcea(e=ec,c=cc,ref=2,interventions=treatsc,Kmax=2500) # Max cost-effectivness threshold is over 3 times
GDPpc per DALY averted
layout(matrix(1:4,2,2)) #so the four health economic analysis plots from the following commands are on one page
ceplane.plot(ci,comparison=1,wtp=779.8) # Cost-effectiveness plane - Willingness to Pay (WTP) threshold is
$779.8 GDPpc (per DALY averted)
eib.plot(ci) # Expected Incremental Benefit
ceac.plot(ci) # Cost-effectiveness Acceptability Curve (prob cost-effective by WTP)
evi.plot(ci) # Expected value of information by willingness to pay
quartz.save("Figure1.pdf", type="pdf")
summary(ci,wtp=780) # Increments of 5 are only allowed in this command therefore 779.8 is not allowed
# Facility Intervention (FI) vs Do Nothing
ef <- cf <- matrix(NA,model$BUGSoutput$n.sims,2)
ef <- matrix(c((bs_nf*86.0 + ms_nf*53.27),(bs_f*86.0 + ms_f*53.27)),model$BUGSoutput$n.sims,2) # effects = baby
(times 86.0 DALYs each) survivors + mother survivors (times 53.27 DALYs each) in No FI, baby (times 86.0 DALYs
each) survivors + mother survivors (times 53.27 DALYs each) in FI
cf <- matrix(c(rep(0,model$BUGSoutput$n.sims),rep(5592212,model$BUGSoutput$n.sims)),model$BUGSoutput$n.sims,2) #
costs = cost of do nothing, cost of community intervention
treatsf <- c("do nothing","Facility Intervention")
fi <- bcea(e=ef,c=cf,ref=2,interventions=treatsf,Kmax=2500)
layout(matrix(1:4,2,2)) #so the four health economic analysis plots from the following commands are on one page
ceplane.plot(fi,comparison=1,wtp=779.8) # Cost-effectiveness plane
eib.plot(fi) # Expected Incremental Benefit
ceac.plot(fi) # Cost-effectiveness Acceptability Curve (prob cost-effective by WTP)
evi.plot(fi) # Expected value of information by willingness to pay

```



```

quartz.save("Figure2.pdf", type="pdf")
summary(fi,wtp=780) # Increments of 5 are only allowed in this command therefore 779.8 is not allowed
# Community Intervention (CI) vs Facility Intervention (FI)
e2 <- c2 <- matrix(NA,model$BUGSoutput$n.sims,2)
e2 <- matrix(c((bs_c*86.0 + ms_c*53.27),(bs_f*86.0 + ms_f*53.27)),model$BUGSoutput$n.sims,2) # effects = baby
(times 86.0 DALYs each) survivors + mother survivors (times 53.27 DALYs each) in CI, baby (times 86.0 DALYs each)
survivors + mother survivors (times 53.27 DALYs each) in FI
c2 <- matrix(c(rep(5348791,model$BUGSoutput$n.sims),rep(5592212,model$BUGSoutput$n.sims)),model$BUGSoutput$n.sims,
2) # costs = cost of community intervention, cost of facility intervention
treatscvf <- c("Community Intervention","Facility Intervention")
cvf <- bcea(e=e2,c=c2,ref=1,interventions=treatscvf,Kmax=2500)
layout(matrix(1:4,2,2)) #so the four health economic analysis plots from the following commands are on one page
ceplane.plot(cvf,comparison=1,wtp=779.8) # Cost-effectiveness plane
eib.plot(cvf) # Expected Incremental Benefit
ceac.plot(cvf) # Cost-effectiveness Acceptability Curve (prob cost-effective by WTP)
evi.plot(cvf) # Expected value of information by willingness to pay
quartz.save("plots_CvF.pdf", type="pdf")
summary(cvf,wtp=780) # Increments of 5 are only allowed in this command therefore 779.8 is not allowed

# combined Facility Intervention & Community Intervention (FICI) model
mkfc <- read.csv('MKFC.csv') # data exported from Stata using 'MK_WinBUGS_final_cluster_FC.do' and also stored in
'MKclusterFC.txt'

data2 <- list(mu=mu,P=P,hf=mkfc$hf,fici=mkfc$fici,urb=mkfc$urb,llw=mkfc$llw,sal=mkfc$sal,mvital=mkfc
$mvital,bdeath=mkfc$bdeath,obs=mkfc$obs)

filein2 <- "/Users/timothycolbourn/Documents/Papers/MaiKhanda CEA paper/JAGS revised/MKmodelFC_final.txt"
#filepath to text file containing model

inits2 <- function(){
list(alpha0_b=rnorm(1), alpha0_m=rnorm(1), strata2=rnorm(2,0,1), strata3=rnorm(2,0,1), urban=rnorm(2,0,1),
fc=rnorm(2,0,1))
} # initial values of paramters

params2 <-
c("bs_con","bs_fc","ms_con","ms_fc","orb_fc","orm_fc","lb_fc","db_fc","lm_fc","dm_fc","d_fc","lb_fc_","db_fc_","lm
_fc_","dm_fc_","d_fc_") #paramters to monitor

model2 <- jags(data2,inits2,params2,model.file=filein2,n.chains=2,n.iter=510000,n.burnin=10000,n.thin=10,DIC=TRUE)

print(model2,digits=3,intervals=c(0.025,0.500,0.975)) #produces customised output

m2 <- as.mcmc(model2) #converts the object model to an MCMC structure, for plotting and diagnostics
raftery.diag(m2) #Raftery-Lewis diagnostic estimates of (for each chain[[1]],[[2]]..) number of iterations
required to estimate 2.5th quantile (=q) of posterior dist, with accuracy (tolerance) r of +/-0.005 and
probability s of 0.95 (defaults)
summary(m2) #MCMC error and other indications of convergence. MCMC error is how close posterior SD is to Naive
SE. Time-series SE adjusts Naive SE for autocorrelation; lower values = better convergence

#Health Economic analysis, including EVPPI (p.145-151) - via BCEA package loaded earlier

# combined Facility Intervention & Community Intervention (FICI) vs Do Nothing
s_c <- bs_c*86.0 + ms_c*53.27 # need these estimates from the above model (for the CI v FI v FICI comparison
below) before we attach the estimates from the second model (see line 121 below). Note the number of baby and
mother survivors are each already multiplied by their respective DALYs averted here
s_f <- bs_f*86.0 + ms_f*53.27

attach.jags(model2)
efc <- cfc <- matrix(NA,model2$BUGSoutput$n.sims,2)
efc <- matrix(c((bs_con*86.0 + ms_con*53.27),(bs_fc*86.0 + ms_fc*53.27)),model2$BUGSoutput$n.sims,2) # effects =
baby (times 86.0 DALYs each) survivors + mother survivors (times 53.27 DALYs each) in control, baby (times 86.0
DALYs each) survivors + mother survivors (times 53.27 DALYs each) in FICI
cfc <- matrix(c(rep(0,model2$BUGSoutput$n.sims),rep(5470501,model2$BUGSoutput$n.sims)),model2$BUGSoutput$n.sims,2)
# costs = cost of do nothing, cost of combined facility and community intervention
treatscfc <- c("do nothing","Facility & Community Interventions")
fc <- bcea(e=efc,c=cfc,ref=2,interventions=treatscfc,Kmax=2500)
layout(matrix(1:4,2,2)) #so the four health economic analysis plots from the following commands are on one page
ceplane.plot(fc,comparison=1,wtp=779.8) # Cost-effectiveness plane
eib.plot(fc) # Expected Incremental Benefit
ceac.plot(fc) # Cost-effectiveness Acceptability Curve (prob cost-effective by WTP)
evi.plot(fc) # Expected value of information by willingness to pay
quartz.save("Figure3.pdf", type="pdf")
summary(fc,wtp=780) # Increments of 5 are only allowed in this command therefore 779.8 is not allowed
# Community Intervention (CI) vs Facility Intervention (FI) vs. combined FICI
e3 <- c3 <- matrix(NA,model$BUGSoutput$n.sims,3)
e3 <- matrix(c(s_c,s_f,(bs_fc*86.0*2 + ms_fc*53.27*2)),model$BUGSoutput$n.sims,3) # effects = baby+mother
survivors (*DALYs, see line 103) in CI, baby+mother survivors (*DALYs, see line 104) in FI, baby+mother survivors
in FICI (*DALYs) multiplied by two so the population size is the same as CI, and FI

```

```

c3 <- matrix(c(rep(5348791,model$BUGSoutput$n.sims),rep(5592212,model$BUGSoutput$n.sims),rep(5470501*2,model
$BUGSoutput$n.sims)),model$BUGSoutput$n.sims,3) # costs = cost of community intervention, cost of facility
intervention, cost of FICI multiplied by two so the population size is the same as CI, and FI
treats3 <- c("Community Intervention","Facility Intervention","FICI")
cvfvfc <- bcea(e=e3,c=c3,ref=1,interventions=treats3,Kmax=2500)
layout(matrix(1:4,2,2)) #so the four health economic analysis plots from the following commands are on one page
ceplane.plot(cvfvfc,comparison=2,wtp=779.8) # Cost-effectiveness plane
eib.plot(cvfvfc) # Expected Incremental Benefit
ceac.plot(cvfvfc) # Cost-effectiveness Acceptability Curve (prob cost-effective by WTP)
evi.plot(cvfvfc) # Expected value of information by willingness to pay
quartz.save("Figure4.pdf", type="pdf")
summary(cvfvfc,wtp=780) # Increments of 5 are only allowed in this command therefore 779.8 is not allowed
# Facility Intervention (FI) vs Community Intervention (CI) vs combined FICI
fvcvfc <- bcea(e=e3,c=c3,ref=2,interventions=treats3,Kmax=2500)
layout(matrix(1:4,2,2)) #so the four health economic analysis plots from the following commands are on one page
ceplane.plot(fvcvfc,comparison=2,wtp=779.8) # Cost-effectiveness plane
eib.plot(fvcvfc) # Expected Incremental Benefit
ceac.plot(fvcvfc) # Cost-effectiveness Acceptability Curve (prob cost-effective by WTP)
evi.plot(fvcvfc) # Expected value of information by willingness to pay
quartz.save("plots_FvCvFC.pdf", type="pdf")
summary(fvcvfc,wtp=780) # Increments of 5 are only allowed in this command therefore 779.8 is not allowed
# combined FICI vs Facility Intervention (FI) vs Community Intervention (CI)
fcvfc <- bcea(e=e3,c=c3,ref=3,interventions=treats3,Kmax=2500)
layout(matrix(1:4,2,2)) #so the four health economic analysis plots from the following commands are on one page
ceplane.plot(fcvfc,comparison=1,wtp=779.8) # Cost-effectiveness plane
eib.plot(fcvfc) # Expected Incremental Benefit
ceac.plot(fcvfc) # Cost-effectiveness Acceptability Curve (prob cost-effective by WTP)
evi.plot(fcvfc) # Expected value of information by willingness to pay
quartz.save("plots_FvCvFC.pdf", type="pdf")
summary(fcvfc,wtp=780) # Increments of 5 are only allowed in this command therefore 779.8 is not allowed

sink()

```

```

setwd("/Users/timothycolbourn/Documents/MaiKhanda CEA paper/JAGS") #set working directory for saving outputs
sink(file="MaiKhanda_future_final_log.txt",split=TRUE)
# MaiKhanda Economic Evaluation v4 in R and JAGS Tim Colbourn 2nd Dec 2014
#install.packages("R2jags")
library(R2jags)
#install.packages("BCEA")
library(BCEA)

# Community Intervention and Facility Intervention model

mk <- read.csv('MK.csv') # data exported from Stata using 'MK_WinBUGS_final_cluster.do' and also stored in
'MKcluster.txt'

h <- 100
mu <- c(0,0)
P <- (1/h^2)*diag(2)

data <- list(mu=mu,P=P,hf=mk$hf,fi=mk$fi,ci=mk$ci,urb=mk$urb,llw=mk$llw,sal=mk$sal,mvital=mk$mvital,bdeath=mk
$bdeath,obs=mk$obs)

filein <- "/Users/timothycolbourn/Documents/MaiKhanda CEA paper/JAGS/MKmodel.txt" #filepath to text file
containing model

inits <- function(){
  list(alpha0_b=rnorm(1), alpha0_m=rnorm(1), strata2=rnorm(2,0,1), strata3=rnorm(2,0,1), urban=rnorm(2,0,1),
  fac=rnorm(2,0,1), com=rnorm(2,0,1))
  } # initial values of paramters

params <-
c("bs_nc", "bs_c", "ms_nc", "ms_c", "bs_nf", "bs_f", "ms_nf", "ms_f", "orb_c", "orm_c", "orb_f", "orm_f", "lb_c", "db_c", "lm_c",
, "dm_c", "lb_f", "db_f", "lm_f", "dm_f", "d_c", "d_f") #paramters to monitor

model <- jags(data,inits,params,model.file=filein,n.chains=2,n.iter=21000,n.burnin=1000,n.thin=2,DIC=TRUE)

print(model,digits=3,intervals=c(0.025,0.500,0.975))

m <- as.mcmc(model) #converts the object model to an MCMC structure, for plotting and diagnostics
raftery.diag(m) #Raftery-Lewis diagnostic estimates of (for each chain[[1]],[[2]]..) number of iterations
required to estimate 2.5th quantile (=q) of posterior dist, with accuracy (tolerance) r of +/-0.005 and
probability s of 0.95 (defaults)
summary(m) #MCMC error and other indications of convergence. MCMC error is how close posterior SD is to Naive SE.
Time-series SE adjusts Naive SE for autocorrelation; lower values = better convergence

#Health Economic analysis, including EVPPI (p.145-151) - via BCEA package loaded earlier
attach.jags(model)
# Community Intervention (CI) vs Do Nothing
ec <- cc <- matrix(NA,model$BUGSoutput$n.sims,2)
ec <- matrix(c((bs_nc*86.0 + ms_nc*53.27),(bs_c*86.0 + ms_c*53.27)),model$BUGSoutput$n.sims,2) # effects = baby
(times 86.0 DALYs each) survivors + mother survivors (times 53.27 DALYs each) in No CI, baby (times 86.0 DALYs
each) survivors + mother survivors (times 53.27 DALYs each) in CI
cc <- matrix(c(rep(0,model$BUGSoutput$n.sims),rep(5348791,model$BUGSoutput$n.sims)),model$BUGSoutput$n.sims,2) #
costs = cost of do nothing, cost of community intervention
treatsc <- c("do nothing","Community Intervention")
ci <- bcea(e=ec,c=cc,ref=2,interventions=treatsc,Kmax=2500) # Max cost-effectivness threshold is over 3 times
GDPpc per DALY averted
layout(matrix(1:4,2,2)) #so the four health economic analysis plots from the following commands are on one page
ceplane.plot(ci,comparison=1,wtp=779.8) # Cost-effectiveness plane - Willingness to Pay (WTP) threshold is
$779.8 GDPpc (per DALY averted)
eib.plot(ci) # Expected Incremental Benefit
ceac.plot(ci) # Cost-effectiveness Acceptability Curve (prob cost-effective by WTP)
evi.plot(ci) # Expected value of information by willingness to pay
quartz.save("plots_C_.pdf", type="pdf")
summary(ci,wtp=780) # Increments of 5 are only allowed in this command therefore 779.8 is not allowed

# Facility Intervention (FI) vs Do Nothing
ef <- cf <- matrix(NA,model$BUGSoutput$n.sims,2)
ef <- matrix(c((bs_nf*86.0 + ms_nf*53.27),(bs_f*86.0 + ms_f*53.27)),model$BUGSoutput$n.sims,2) # effects = baby
(times 86.0 DALYs each) survivors + mother survivors (times 53.27 DALYs each) in No FI, baby (times 86.0 DALYs
each) survivors + mother survivors (times 53.27 DALYs each) in FI
cf <- matrix(c(rep(0,model$BUGSoutput$n.sims),rep(5592212,model$BUGSoutput$n.sims)),model$BUGSoutput$n.sims,2) #
costs = cost of do nothing, cost of community intervention
treatsf <- c("do nothing","Facility Intervention")
fi <- bcea(e=ef,c=cf,ref=2,interventions=treatsf,Kmax=2500)
layout(matrix(1:4,2,2)) #so the four health economic analysis plots from the following commands are on one page
ceplane.plot(fi,comparison=1,wtp=779.8) # Cost-effectiveness plane
eib.plot(fi) # Expected Incremental Benefit
ceac.plot(fi) # Cost-effectiveness Acceptability Curve (prob cost-effective by WTP)
evi.plot(fi) # Expected value of information by willingness to pay
quartz.save("plots_F_.pdf", type="pdf")

```

```

summary(fi,wtp=780) # Increments of 5 are only allowed in this command therefore 779.8 is not allowed
# Community Intervention (CI) vs Facility Intervention (FI)
e2 <- c2 <- matrix(NA,model$BUGSoutput$n.sims,2)
e2 <- matrix(c((bs_c*86.0 + ms_c*53.27),(bs_f*86.0 + ms_f*53.27)),model$BUGSoutput$n.sims,2) # effects = baby
(times 86.0 DALYs each) survivors + mother survivors (times 53.27 DALYs each) in CI, baby (times 86.0 DALYs each)
survivors + mother survivors (times 53.27 DALYs each) in FI
c2 <- matrix(c(rep(5348791,model$BUGSoutput$n.sims),rep(5592212,model$BUGSoutput$n.sims)),model$BUGSoutput$n.sims,
2) # costs = cost of community intervention, cost of facility intervention
treatscvf <- c("Community Intervention","Facility Intervention")
cvf <- bcea(e=e2,c=c2,ref=1,interventions=treatscvf,Kmax=2500)
layout(matrix(1:4,2,2)) #so the four health economic analysis plots from the following commands are on one page
ceplane.plot(cvf,comparison=1,wtp=779.8) # Cost-effectiveness plane
eib.plot(cvf) # Expected Incremental Benefit
ceac.plot(cvf) # Cost-effectiveness Acceptability Curve (prob cost-effective by WTP)
evi.plot(cvf) # Expected value of information by willingness to pay
quartz.save("plots_CvF_.pdf", type="pdf")
summary(cvf,wtp=780) # Increments of 5 are only allowed in this command therefore 779.8 is not allowed

# combined Facility Intervention & Community Intervention (FICI) model
mkfc <- read.csv('MKFC.csv') # data exported from Stata using 'MK_WinBUGS_final_cluster_FC.do' and also stored in
'MKclusterFC.txt'

data2 <- list(mu=mu,P=P,hf=mkfc$hf,fici=mkfc$fici,urb=mkfc$urb,llw=mkfc$llw,sal=mkfc$sal,mvital=mkfc
$mvital,bdeath=mkfc$bdeath,obs=mkfc$obs)

filein2 <- "/Users/timothycolbourn/Documents/MaiKhanda CEA paper/JAGS/MKmodelFC.txt" #filepath to text file
containing model

inits2 <- function(){
list(alpha0_b=rnorm(1), alpha0_m=rnorm(1), strata2=rnorm(2,0,1), strata3=rnorm(2,0,1), urban=rnorm(2,0,1),
fc=rnorm(2,0,1))
} # initial values of paramters

params2 <- c("bs_con","bs_fc","ms_con","ms_fc","orb_fc","orm_fc","lb_fc","db_fc","lm_fc","dm_fc","d_fc")
#paramters to monitor

model2 <- jags(data2,inits2,params2,model.file=filein2,n.chains=2,n.iter=21000,n.burnin=1000,n.thin=2,DIC=TRUE)

print(model2,digits=3,intervals=c(0.025,0.500,0.975)) #produces customised output

m2 <- as.mcmc(model2) #converts the object model to an MCMC structure, for plotting and diagnostics
raftery.diag(m2) #Raftery-Lewis diagnostic estimates of (for each chain[[1]],[[2]]..) number of iterations
required to estimate 2.5th quantile (=q) of posterior dist, with accuracy (tolerance) r of +/-0.005 and
probability s of 0.95 (defaults)
summary(m2) #MCMC error and other indications of convergence. MCMC error is how close posterior SD is to Naive
SE. Time-series SE adjusts Naive SE for autocorrelation; lower values = better convergence

#Health Economic analysis, including EVPPi (p.145-151) - via BCEA package loaded earlier

# combined Facility Intervention & Community Intervention (FICI) vs Do Nothing
s_c <- bs_c*86.0 + ms_c*53.27 # need these estimates from the above model (for the CI v FI v FICI comparison
below) before we attach the estimates from the second model (see line 121 below). Note the number of baby and
mother survivors are each already multiplied by their respective DALYs averted here
s_f <- bs_f*86.0 + ms_f*53.27

attach.jags(model2)
efc <- cfc <- matrix(NA,model2$BUGSoutput$n.sims,2)
efc <- matrix(c((bs_con*86.0 + ms_con*53.27),(bs_fc*86.0 + ms_fc*53.27)),model2$BUGSoutput$n.sims,2) # effects =
baby (times 86.0 DALYs each) survivors + mother survivors (times 53.27 DALYs each) in control, baby (times 86.0
DALYs each) survivors + mother survivors (times 53.27 DALYs each) in FICI
cfc <- matrix(c(rep(0,model2$BUGSoutput$n.sims),rep(5470501,model2$BUGSoutput$n.sims)),model$BUGSoutput$n.sims,2)
# costs = cost of do nothing, cost of combined facility and community intervention
treatscfc <- c("do nothing","Facility & Community Interventions")
fc <- bcea(e=efc,c=cfc,ref=2,interventions=treatscfc,Kmax=2500)
layout(matrix(1:4,2,2)) #so the four health economic analysis plots from the following commands are on one page
ceplane.plot(fc,comparison=1,wtp=779.8) # Cost-effectiveness plane
eib.plot(fc) # Expected Incremental Benefit
ceac.plot(fc) # Cost-effectiveness Acceptability Curve (prob cost-effective by WTP)
evi.plot(fc) # Expected value of information by willingness to pay
quartz.save("plots_FC_.pdf", type="pdf")
summary(fc,wtp=780) # Increments of 5 are only allowed in this command therefore 779.8 is not allowed
# Community Intervention (CI) vs Facility Intervention (FI) vs. combined FICI
e3 <- c3 <- matrix(NA,model$BUGSoutput$n.sims,3)
e3 <- matrix(c((s_c,s_f),(bs_fc*86.0*2 + ms_fc*53.27*2)),model$BUGSoutput$n.sims,3) # effects = baby+mother
survivors (*DALYs, see line 103) in CI, baby+mother survivors (*DALYs, see line 104) in FI, baby+mother survivors
in FICI (*DALYs) multiplied by two so the population size is the same as CI, and FI
c3 <- matrix(c(rep(5348791,model$BUGSoutput$n.sims),rep(5592212,model$BUGSoutput$n.sims),rep(5470501*2,model
$BUGSoutput$n.sims)),model$BUGSoutput$n.sims,3) # costs = cost of community intervention, cost of facility

```

```

intervention, cost of FICI multiplied by two so the population size is the same as CI, and FI
treats3 <- c("Community Intervention", "Facility Intervention", "FICI")
cvfvfc <- bcea(e=e3, c=c3, ref=1, interventions=treats3, Kmax=2500)
layout(matrix(1:4, 2, 2)) #so the four health economic analysis plots from the following commands are on one page
ceplane.plot(cvfvfc, comparison=2, wtp=779.8) # Cost-effectiveness plane
eib.plot(cvfvfc) # Expected Incremental Benefit
ceac.plot(cvfvfc) # Cost-effectiveness Acceptability Curve (prob cost-effective by WTP)
evi.plot(cvfvfc) # Expected value of information by willingness to pay
quartz.save("plots_CvFvFC_.pdf", type="pdf")
summary(cvfvfc, wtp=780) # Increments of 5 are only allowed in this command therefore 779.8 is not allowed

#Future scale-up 1
years <- 5 # Time Horizon: Years of scale-up projection
cdr <- 0.03 # Cost Discount Rate (per year)
edr <- 0.00 # Effect Discount Rate (per year)
cycle <- c(1:years)
scale <- (15013694*0.04*2)/(1200000*0.04*2) # scale-up conversion factor - see Table 2 of paper - ratio of trial
population to total population of Malawi (assume budget for intervention scales proportionally with increased
population so that the total beneficiaries per year and total cost per year (not discounted) remains the same)

s_cm <- (s_c/2.25)*scale # DALYs averted per year by the Community Intervention if scaled-up to the whole of
Malawi
fut_ec_ = NA * c(1:(length(s_cm)*length(cycle)))
fut_ec_5 <- fut_ec_4 <- fut_ec_3 <- fut_ec_2 <- fut_ec_1 <- NULL
for (a in 1:length(s_cm)) {
  for (i in 1:length(cycle)) fut_ec__[i] <- c(s_cm[a]/((1+edr)^i))
  fut_ec_5[a] <- fut_ec__[i]
}
for (a in 1:length(s_cm)) {
  for (i in 1:length(cycle)) fut_ec__[i] <- c(s_cm[a]/((1+edr)^i))
  fut_ec_4[a] <- fut_ec__[i-1]
}
for (a in 1:length(s_cm)) {
  for (i in 1:length(cycle)) fut_ec__[i] <- c(s_cm[a]/((1+edr)^i))
  fut_ec_3[a] <- fut_ec__[i-2]
}
for (a in 1:length(s_cm)) {
  for (i in 1:length(cycle)) fut_ec__[i] <- c(s_cm[a]/((1+edr)^i))
  fut_ec_2[a] <- fut_ec__[i-3]
}
for (a in 1:length(s_cm)) {
  for (i in 1:length(cycle)) fut_ec__[i] <- c(s_cm[a]/((1+edr)^i))
  fut_ec_1[a] <- fut_ec__[i-4]
}
}
fut_ec_ <- c(fut_ec_1, fut_ec_2, fut_ec_3, fut_ec_4, fut_ec_5)
fut_ec <- tapply( fut_ec_, (seq_along(fut_ec_)-1) %/% years, sum) # Future effects of CI for all years in time
horizon added together (for each of the simulations)
start_c <- 362083*scale # Start-up costs of Community Intervention for the whole of Malawi
annual_c <- (27250+2068997)*scale # Annual running costs of Community Intervention for the whole of Malawi
annual_ext_c <- 120067*scale # Annual external costs of Community Intervention for the whole of Malawi
fut_cc_ <- NULL
for (i in 1:length(cycle)) fut_cc_[i] <- c((annual_c + annual_ext_c)/((1+cdr)^i)) # Future costs of CI for each
year in time horizon
fut_cc <- start_c + tapply( fut_cc_, (seq_along(fut_cc_)-1) %/% years, sum) # Future costs of CI for all years
in time horizon added together (this is constant so needs to be replicated by the number of simulations in the
BCEA)

s_fm <- (s_f/2.25)*scale # DALYs averted per year by the Facility Intervention if scaled-up to the whole of
Malawi
fut_ef_ = NA * c(1:(length(s_fm)*length(cycle)))
fut_ef_5 <- fut_ef_4 <- fut_ef_3 <- fut_ef_2 <- fut_ef_1 <- NULL
for (a in 1:length(s_fm)) {
  for (i in 1:length(cycle)) fut_ef__[i] <- c(s_fm[a]/((1+edr)^i))
  fut_ef_5[a] <- fut_ef__[i]
}
for (a in 1:length(s_fm)) {
  for (i in 1:length(cycle)) fut_ef__[i] <- c(s_fm[a]/((1+edr)^i))
  fut_ef_4[a] <- fut_ef__[i-1]
}
for (a in 1:length(s_fm)) {
  for (i in 1:length(cycle)) fut_ef__[i] <- c(s_fm[a]/((1+edr)^i))
  fut_ef_3[a] <- fut_ef__[i-2]
}
for (a in 1:length(s_fm)) {
  for (i in 1:length(cycle)) fut_ef__[i] <- c(s_fm[a]/((1+edr)^i))
  fut_ef_2[a] <- fut_ef__[i-3]
}
for (a in 1:length(s_fm)) {

```

```

    for (i in 1:length(cycle)) fut_ef__[i] <-c(s_fm[a]/((1+edr)^i))
    fut_ef_1[a] <- fut_ef__[i-4]
  }
fut_ef_ <- c(fut_ef_1,fut_ef_2,fut_ef_3,fut_ef_4,fut_ef_5)
fut_ef <- tapply( fut_ef_, (seq_along(fut_ef_)-1) %/% years, sum) # Future effects of FI for all years in time
horizon added together, for each of the simulations
start_f <- 362860*scale # Start-up costs of Facility Intervention for the whole of Malawi
annual_f <- (25328+2026811)*scale # Annual running costs of Facility Intervention for the whole of Malawi
annual_ext_f <- 272017*scale # Annual external costs of Facility Intervention for the whole of Malawi
fut_cf_ <- NULL
for (i in 1:length(cycle)) fut_cf_[i] <-c((annual_f + annual_ext_f)/((1+edr)^i)) # Future costs of FI for each
year in time horizon
fut_cf <- start_f + tapply( fut_cf_, (seq_along(fut_cf_)-1) %/% years, sum) # Future costs of FI for all years
in time horizon added together, for each of the simulations

s_fc <- (bs_fc*86.0*2 + ms_fc*53.27*2)/2.25 #DALYs averted per year by FICI, doubled so the same as CI or FI
two-arm trial
s_fcm <- s_fc*scale # DALYs saved by the combined Facility and Community Intervention if scaled-up to the whole
of Malawi
fut_efc_<-NA*c(1:(length(s_fcm)*length(cycle)))
fut_efc__ <- fut_efc_5 <- fut_efc_4 <- fut_efc_3 <- fut_efc_2 <- fut_efc_1 <- NULL
for (a in 1:length(s_fcm)) {
  for (i in 1:length(cycle)) fut_efc__[i] <-c(s_fcm[a]/((1+edr)^i))
  fut_efc_5[a] <- fut_efc__[i]
}
for (a in 1:length(s_fcm)) {
  for (i in 1:length(cycle)) fut_efc__[i] <-c(s_fcm[a]/((1+edr)^i))
  fut_efc_4[a] <- fut_efc__[i-1]
}
for (a in 1:length(s_fcm)) {
  for (i in 1:length(cycle)) fut_efc__[i] <-c(s_fcm[a]/((1+edr)^i))
  fut_efc_3[a] <- fut_efc__[i-2]
}
for (a in 1:length(s_fcm)) {
  for (i in 1:length(cycle)) fut_efc__[i] <-c(s_fcm[a]/((1+edr)^i))
  fut_efc_2[a] <- fut_efc__[i-3]
}
for (a in 1:length(s_fcm)) {
  for (i in 1:length(cycle)) fut_efc__[i] <-c(s_fcm[a]/((1+edr)^i))
  fut_efc_1[a] <- fut_efc__[i-4]
}
}
fut_efc_ <- c(fut_efc_1,fut_efc_2,fut_efc_3,fut_efc_4,fut_efc_5)
fut_efc <- tapply( fut_efc_, (seq_along(fut_efc_)-1) %/% years, sum) # Future effects of FICI for all years in
time horizon added together, for each of the simulations
start_fc <- 362472*2*scale # Start-up costs of the combined Facility and Community Intervention for the whole of
Malawi
annual_fc <- (26289+2047904)*2*scale # Annual running costs of the combined Facility and Community Intervention
for the whole of Malawi
annual_ext_fc <- 196042*2*scale # Annual external costs of FICI for the whole of Malawi
fut_cfc_ <- NULL
for (i in 1:length(cycle)) fut_cfc_[i] <-c((annual_fc + annual_ext_fc)/((1+edr)^i)) # Future costs of FI for
each year in time horizon
fut_cfc <- start_fc + tapply( fut_cfc_, (seq_along(fut_cfc_)-1) %/% years, sum) # Future costs of FICI for all
years in time horizon added together, for each of the simulations

# Future scale-up: Community Intervention (CI) vs Facility Intervention (FI) vs. combined FICI
e4 <- c4 <- matrix(NA,model$BUGSoutput$n.sims,3)
e4 <- matrix(c(fut_ec,fut_ef,fut_efc),model$BUGSoutput$n.sims,3) # effects - see lines 142, 151 and 161 above
c4 <- matrix(c(rep(fut_cc,model$BUGSoutput$n.sims),rep(fut_cf,model$BUGSoutput$n.sims),rep(fut_cfc,model
$BUGSoutput$n.sims)),model$BUGSoutput$n.sims,3) # costs - see lines 147, 156 and 166 above
future <- bcea(e=e4,c=c4,ref=1,interventions=treats3,Kmax=2500)
layout(matrix(1:4,2,2)) #so the four health economic analysis plots from the following commands are on one page
ceplane.plot(future,comparison=2,wtp=779.8) # Cost-effectiveness plane
eib.plot(future) # Expected Incremental Benefit
ceac.plot(future) # Cost-effectiveness Acceptability Curve (prob cost-effective by WTP)
evi.plot(future) # Expected value of information by willingness to pay
quartz.save("plots_future_5_003_000.pdf", type="pdf")
print("time horizon in years")
years
print("cost discount rate")
cdr
print("effects discount rate")
edr
summary(future,wtp=780)

# ... Future scale-up scenarios 2-9 omitted to save space, the code is identical to that for Future scale-up
scenario 1 above, except for changing the years cdr and edr inputs in the first 3 lines and the
quartz.save("plots_future_X_XXX_XXX.pdf" command eight lines from the end ...

```

```

#Future scale-up 10
years <- 10 # Time Horizon: Years of scale-up projection
cdr <- 0.03 # Cost Discount Rate (per year)
edr <- 0.00 # Effect Discount Rate (per year)
cycle <- c(1:years)
scale <- (15013694*0.04*2)/(1200000*0.04*2) # scale-up conversion factor - see Table 2 of paper - ratio of trial
population to total population of Malawi (assume budget for intervention scales proportionally with increased
population so that the total beneficiaries per year and total cost per year (not discounted) remains the same)

s_cm <- (s_c/2.25)*scale # DALYs averted per year by the Community Intervention if scaled-up to the whole of
Malawi
fut_ec_ = NA*c(1:(length(s_cm)*length(cycle)))
fut_ec__ <- fut_ec_10 <- fut_ec_9 <- fut_ec_8 <- fut_ec_7 <- fut_ec_6 <- fut_ec_5 <- fut_ec_4 <- fut_ec_3 <-
fut_ec_2 <- fut_ec_1 <- NULL
for (a in 1:length(s_cm)) {
  for (i in 1:length(cycle)) fut_ec__[i] <-c(s_cm[a]/((1+edr)^i))
  fut_ec_10[a] <- fut_ec__[i]
}
for (a in 1:length(s_cm)) {
  for (i in 1:length(cycle)) fut_ec__[i] <-c(s_cm[a]/((1+edr)^i))
  fut_ec_9[a] <- fut_ec__[i-1]
}
for (a in 1:length(s_cm)) {
  for (i in 1:length(cycle)) fut_ec__[i] <-c(s_cm[a]/((1+edr)^i))
  fut_ec_8[a] <- fut_ec__[i-2]
}
for (a in 1:length(s_cm)) {
  for (i in 1:length(cycle)) fut_ec__[i] <-c(s_cm[a]/((1+edr)^i))
  fut_ec_7[a] <- fut_ec__[i-3]
}
for (a in 1:length(s_cm)) {
  for (i in 1:length(cycle)) fut_ec__[i] <-c(s_cm[a]/((1+edr)^i))
  fut_ec_6[a] <- fut_ec__[i-4]
}
for (a in 1:length(s_cm)) {
  for (i in 1:length(cycle)) fut_ec__[i] <-c(s_cm[a]/((1+edr)^i))
  fut_ec_5[a] <- fut_ec__[i-5]
}
for (a in 1:length(s_cm)) {
  for (i in 1:length(cycle)) fut_ec__[i] <-c(s_cm[a]/((1+edr)^i))
  fut_ec_4[a] <- fut_ec__[i-6]
}
for (a in 1:length(s_cm)) {
  for (i in 1:length(cycle)) fut_ec__[i] <-c(s_cm[a]/((1+edr)^i))
  fut_ec_3[a] <- fut_ec__[i-7]
}
for (a in 1:length(s_cm)) {
  for (i in 1:length(cycle)) fut_ec__[i] <-c(s_cm[a]/((1+edr)^i))
  fut_ec_2[a] <- fut_ec__[i-8]
}
for (a in 1:length(s_cm)) {
  for (i in 1:length(cycle)) fut_ec__[i] <-c(s_cm[a]/((1+edr)^i))
  fut_ec_1[a] <- fut_ec__[i-9]
}
fut_ec_ <- c(fut_ec_1,fut_ec_2,fut_ec_3,fut_ec_4,fut_ec_5,fut_ec_6,fut_ec_7,fut_ec_8,fut_ec_9,fut_ec_10)
fut_ec <- tapply( fut_ec_, (seq_along(fut_ec_)-1) %/% years, sum) # Future effects of CI for all years in time
horizon added together (for each of the simulations)
start_c <- 362083*scale # Start-up costs of Community Intervention for the whole of Malawi
annual_c <- (27250+2068997)*scale # Annual running costs of Community Intervention for the whole of Malawi
annualext_c <- 120067*scale # Annual external costs of Community Intervention for the whole of Malawi
fut_cc_ <- NULL
for (i in 1:length(cycle)) fut_cc_[i] <-c((annual_c + annualext_c)/((1+cdr)^i)) # Future costs of CI for each
year in time horizon
fut_cc <- start_c + tapply( fut_cc_, (seq_along(fut_cc_)-1) %/% years, sum) # Future costs of CI for all years
in time horizon added together (this is constant so needs to be replicated by the number of simulations in the
BCEA)

s_fm <- (s_f/2.25)*scale # DALYs averted per year by the Facility Intervention if scaled-up to the whole of
Malawi
fut_ef_ = NA*c(1:(length(s_fm)*length(cycle)))
fut_ef__ <- fut_ef_10 <- fut_ef_9 <- fut_ef_8 <- fut_ef_7 <- fut_ef_6 <- fut_ef_5 <- fut_ef_4 <- fut_ef_3 <-
fut_ef_2 <- fut_ef_1 <- NULL
for (a in 1:length(s_fm)) {
  for (i in 1:length(cycle)) fut_ef__[i] <-c(s_fm[a]/((1+edr)^i))
  fut_ef_10[a] <- fut_ef__[i]
}
for (a in 1:length(s_fm)) {

```

```

    for (i in 1:length(cycle)) fut_ef__[i] <-c(s_fm[a]/((1+edr)^i))
    fut_ef_9[a] <- fut_ef__[i-1]
  }
  for (a in 1:length(s_fm)) {
    for (i in 1:length(cycle)) fut_ef__[i] <-c(s_fm[a]/((1+edr)^i))
    fut_ef_8[a] <- fut_ef__[i-2]
  }
  for (a in 1:length(s_fm)) {
    for (i in 1:length(cycle)) fut_ef__[i] <-c(s_fm[a]/((1+edr)^i))
    fut_ef_7[a] <- fut_ef__[i-3]
  }
  for (a in 1:length(s_fm)) {
    for (i in 1:length(cycle)) fut_ef__[i] <-c(s_fm[a]/((1+edr)^i))
    fut_ef_6[a] <- fut_ef__[i-4]
  }
  for (a in 1:length(s_fm)) {
    for (i in 1:length(cycle)) fut_ef__[i] <-c(s_fm[a]/((1+edr)^i))
    fut_ef_5[a] <- fut_ef__[i-5]
  }
  for (a in 1:length(s_fm)) {
    for (i in 1:length(cycle)) fut_ef__[i] <-c(s_fm[a]/((1+edr)^i))
    fut_ef_4[a] <- fut_ef__[i-6]
  }
  for (a in 1:length(s_fm)) {
    for (i in 1:length(cycle)) fut_ef__[i] <-c(s_fm[a]/((1+edr)^i))
    fut_ef_3[a] <- fut_ef__[i-7]
  }
  for (a in 1:length(s_fm)) {
    for (i in 1:length(cycle)) fut_ef__[i] <-c(s_fm[a]/((1+edr)^i))
    fut_ef_2[a] <- fut_ef__[i-8]
  }
  for (a in 1:length(s_fm)) {
    for (i in 1:length(cycle)) fut_ef__[i] <-c(s_fm[a]/((1+edr)^i))
    fut_ef_1[a] <- fut_ef__[i-9]
  }
  fut_ef_ <- c(fut_ef_1,fut_ef_2,fut_ef_3,fut_ef_4,fut_ef_5,fut_ef_6,fut_ef_7,fut_ef_8,fut_ef_9,fut_ef_10)
  fut_ef <- tapply( fut_ef_, (seq_along(fut_ef_)-1) %/% years, sum) # Future effects of CI for all years in time
  horizon added together (for each of the simulations)
  start_f <- 362860*scale # Start-up costs of Facility Intervention for the whole of Malawi
  annual_f <- (25328+2026811)*scale # Annual running costs of Facility Intervention for the whole of Malawi
  annualext_f <- 272017*scale # Annual external costs of Facility Intervention for the whole of Malawi
  fut_cf_ <- NULL
  for (i in 1:length(cycle)) fut_cf_[i] <-c((annual_f + annualext_f)/((1+edr)^i)) # Future costs of FI for each
  year in time horizon
  fut_cf <- start_f + tapply( fut_cf_, (seq_along(fut_cf_)-1) %/% years, sum) # Future costs of FI for all years
  in time horizon added together, for each of the simulations

  s_fc <- (bs_fc*86.0*2 + ms_fc*53.27*2)/2.25 #DALYs averted per year by FICI, doubled so the same as CI or FI
  two-arm trial
  s_fcm <- s_fc*scale # DALYs saved by the combined Facility and Community Intervention if scaled-up to the whole
  of Malawi
  fut_efc_<NA*c(1:(length(s_fcm)*length(cycle)))
  fut_efc__ <- fut_efc_10 <- fut_efc_9 <- fut_efc_8 <- fut_efc_7 <- fut_efc_6 <- fut_efc_5 <- fut_efc_4 <-
  fut_efc_3 <- fut_efc_2 <- fut_efc_1 <- NULL
  for (a in 1:length(s_fcm)) {
    for (i in 1:length(cycle)) fut_efc__[i] <-c(s_fcm[a]/((1+edr)^i))
    fut_efc_10[a] <- fut_efc__[i]
  }
  for (a in 1:length(s_fcm)) {
    for (i in 1:length(cycle)) fut_efc__[i] <-c(s_fcm[a]/((1+edr)^i))
    fut_efc_9[a] <- fut_efc__[i-1]
  }
  for (a in 1:length(s_fcm)) {
    for (i in 1:length(cycle)) fut_efc__[i] <-c(s_fcm[a]/((1+edr)^i))
    fut_efc_8[a] <- fut_efc__[i-2]
  }
  for (a in 1:length(s_fcm)) {
    for (i in 1:length(cycle)) fut_efc__[i] <-c(s_fcm[a]/((1+edr)^i))
    fut_efc_7[a] <- fut_efc__[i-3]
  }
  for (a in 1:length(s_fcm)) {
    for (i in 1:length(cycle)) fut_efc__[i] <-c(s_fcm[a]/((1+edr)^i))
    fut_efc_6[a] <- fut_efc__[i-4]
  }
  for (a in 1:length(s_fcm)) {
    for (i in 1:length(cycle)) fut_efc__[i] <-c(s_fcm[a]/((1+edr)^i))
    fut_efc_5[a] <- fut_efc__[i-5]
  }
  for (a in 1:length(s_fcm)) {

```



```

    for (i in 1:length(cycle)) fut_efc__[i] <-c(s_fcm[a]/((1+edr)^i))
    fut_efc_4[a] <- fut_efc__[i-6]
  }
  for (a in 1:length(s_fcm)) {
    for (i in 1:length(cycle)) fut_efc__[i] <-c(s_fcm[a]/((1+edr)^i))
    fut_efc_3[a] <- fut_efc__[i-7]
  }
  for (a in 1:length(s_fcm)) {
    for (i in 1:length(cycle)) fut_efc__[i] <-c(s_fcm[a]/((1+edr)^i))
    fut_efc_2[a] <- fut_efc__[i-8]
  }
  for (a in 1:length(s_fcm)) {
    for (i in 1:length(cycle)) fut_efc__[i] <-c(s_fcm[a]/((1+edr)^i))
    fut_efc_1[a] <- fut_efc__[i-9]
  }
}
fut_efc_ <-
c(fut_efc_1,fut_efc_2,fut_efc_3,fut_efc_4,fut_efc_5,fut_efc_6,fut_efc_7,fut_efc_8,fut_efc_9,fut_efc_10)
fut_efc <- tapply( fut_efc_, (seq_along(fut_efc_)-1) %/% years, sum) # Future effects of FICI for all years in
time horizon added together, for each of the simulations
start_fc <- 362472*2*scale # Start-up costs of the combined Facility and Community Intervention for the whole of
Malawi
annual_fc <- (26289+2047904)*2*scale # Annual running costs of the combined Facility and Community Intervention
for the whole of Malawi
annual_ext_fc <- 196042*2*scale # Annual external costs of FICI for the whole of Malawi
fut_cfc_ <- NULL
for (i in 1:length(cycle)) fut_cfc_[i] <-c((annual_fc + annual_ext_fc)/((1+edr)^i)) # Future costs of FI for
each year in time horizon
fut_cfc <- start_fc + tapply( fut_cfc_, (seq_along(fut_cfc_)-1) %/% years, sum) # Future costs of FICI for all
years in time horizon added together, for each of the simulations

# Future scale-up: Community Intervention (CI) vs Facility Intervention (FI) vs. combined FICI
e4 <- c4 <- matrix(NA,model$BUGSoutput$n.sims,3)
e4 <- matrix(c(fut_ec,fut_ef,fut_efc),model$BUGSoutput$n.sims,3) # effects - see lines 142, 151 and 161 above
c4 <- matrix(c(rep(fut_cc,model$BUGSoutput$n.sims),rep(fut_cf,model$BUGSoutput$n.sims),rep(fut_cfc,model
$BUGSoutput$n.sims)),model$BUGSoutput$n.sims,3) # costs - see lines 147, 156 and 166 above
future <- bcea(e=e4,c=c4,ref=1,interventions=treats3,Kmax=2500)
layout(matrix(1:4,2,2)) #so the four health economic analysis plots from the following commands are on one page
ceplane.plot(future,comparison=2,wt=779.8) # Cost-effectiveness plane
eib.plot(future) # Expected Incremental Benefit
ceac.plot(future) # Cost-effectiveness Acceptability Curve (prob cost-effective by WTP)
evi.plot(future) # Expected value of information by willingness to pay
quartz.save("plots_future_10_003_000.pdf", type="pdf")
print("time horizon in years")
years
print("cost discount rate")
cdr
print("effects discount rate")
edr
summary(future,wt=780)

# ... Future scale-up scenarios 11-18 omitted to save space, the code is identical to that for Future scale-up
scenario 10 above, except for changing the years cdr and edr inputs in the first 3 lines and the
quartz.save("plots_future_X_XXX_XXX.pdf" command eight lines from the end ...

#Future scale-up 19
years <- 20 # Time Horizon: Years of scale-up projection
cdr <- 0.03 # Cost Discount Rate (per year)
edr <- 0.00 # Effect Discount Rate (per year)
cycle <- c(1:years)
scale <- (15013694*0.04^2)/(1200000*0.04^2) # scale-up conversion factor - see Table 2 of paper - ratio of trial
population to total population of Malawi (assume budget for intervention scales proportionally with increased
population so that the total beneficiaries per year and total cost per year (not discounted) remains the same)

s_cm <- (s_c/2.25)*scale # DALYs averted per year by the Community Intervention if scaled-up to the whole of
Malawi
fut_ec_ =NA*c(1:(length(s_cm)*length(cycle)))
fut_ec__ <- fut_ec_20 <- fut_ec_19 <- fut_ec_18 <- fut_ec_17 <- fut_ec_16 <- fut_ec_15 <- fut_ec_14 <- fut_ec_13
<- fut_ec_12 <- fut_ec_11 <- fut_ec_10 <- fut_ec_9 <- fut_ec_8 <- fut_ec_7 <- fut_ec_6 <- fut_ec_5 <- fut_ec_4 <-
fut_ec_3 <- fut_ec_2 <- fut_ec_1 <- NULL
for (a in 1:length(s_cm)) {
  for (i in 1:length(cycle)) fut_ec__[i] <-c(s_cm[a]/((1+edr)^i))
  fut_ec_20[a] <- fut_ec__[i]
}
for (a in 1:length(s_cm)) {
  for (i in 1:length(cycle)) fut_ec__[i] <-c(s_cm[a]/((1+edr)^i))
  fut_ec_19[a] <- fut_ec__[i-1]
}
for (a in 1:length(s_cm)) {

```

```

    for (i in 1:length(cycle)) fut_ec__[i] <-c(s_cm[a]/((1+edr)^i))
    fut_ec_18[a] <- fut_ec__[i-2]
  }
  for (a in 1:length(s_cm)) {
    for (i in 1:length(cycle)) fut_ec__[i] <-c(s_cm[a]/((1+edr)^i))
    fut_ec_17[a] <- fut_ec__[i-3]
  }
  for (a in 1:length(s_cm)) {
    for (i in 1:length(cycle)) fut_ec__[i] <-c(s_cm[a]/((1+edr)^i))
    fut_ec_16[a] <- fut_ec__[i-4]
  }
  for (a in 1:length(s_cm)) {
    for (i in 1:length(cycle)) fut_ec__[i] <-c(s_cm[a]/((1+edr)^i))
    fut_ec_15[a] <- fut_ec__[i-5]
  }
  for (a in 1:length(s_cm)) {
    for (i in 1:length(cycle)) fut_ec__[i] <-c(s_cm[a]/((1+edr)^i))
    fut_ec_14[a] <- fut_ec__[i-6]
  }
  for (a in 1:length(s_cm)) {
    for (i in 1:length(cycle)) fut_ec__[i] <-c(s_cm[a]/((1+edr)^i))
    fut_ec_13[a] <- fut_ec__[i-7]
  }
  for (a in 1:length(s_cm)) {
    for (i in 1:length(cycle)) fut_ec__[i] <-c(s_cm[a]/((1+edr)^i))
    fut_ec_12[a] <- fut_ec__[i-8]
  }
  for (a in 1:length(s_cm)) {
    for (i in 1:length(cycle)) fut_ec__[i] <-c(s_cm[a]/((1+edr)^i))
    fut_ec_11[a] <- fut_ec__[i-9]
  }
  for (a in 1:length(s_cm)) {
    for (i in 1:length(cycle)) fut_ec__[i] <-c(s_cm[a]/((1+edr)^i))
    fut_ec_10[a] <- fut_ec__[i-10]
  }
  for (a in 1:length(s_cm)) {
    for (i in 1:length(cycle)) fut_ec__[i] <-c(s_cm[a]/((1+edr)^i))
    fut_ec_9[a] <- fut_ec__[i-11]
  }
  for (a in 1:length(s_cm)) {
    for (i in 1:length(cycle)) fut_ec__[i] <-c(s_cm[a]/((1+edr)^i))
    fut_ec_8[a] <- fut_ec__[i-12]
  }
  for (a in 1:length(s_cm)) {
    for (i in 1:length(cycle)) fut_ec__[i] <-c(s_cm[a]/((1+edr)^i))
    fut_ec_7[a] <- fut_ec__[i-13]
  }
  for (a in 1:length(s_cm)) {
    for (i in 1:length(cycle)) fut_ec__[i] <-c(s_cm[a]/((1+edr)^i))
    fut_ec_6[a] <- fut_ec__[i-14]
  }
  for (a in 1:length(s_cm)) {
    for (i in 1:length(cycle)) fut_ec__[i] <-c(s_cm[a]/((1+edr)^i))
    fut_ec_5[a] <- fut_ec__[i-15]
  }
  for (a in 1:length(s_cm)) {
    for (i in 1:length(cycle)) fut_ec__[i] <-c(s_cm[a]/((1+edr)^i))
    fut_ec_4[a] <- fut_ec__[i-16]
  }
  for (a in 1:length(s_cm)) {
    for (i in 1:length(cycle)) fut_ec__[i] <-c(s_cm[a]/((1+edr)^i))
    fut_ec_3[a] <- fut_ec__[i-17]
  }
  for (a in 1:length(s_cm)) {
    for (i in 1:length(cycle)) fut_ec__[i] <-c(s_cm[a]/((1+edr)^i))
    fut_ec_2[a] <- fut_ec__[i-18]
  }
  for (a in 1:length(s_cm)) {
    for (i in 1:length(cycle)) fut_ec__[i] <-c(s_cm[a]/((1+edr)^i))
    fut_ec_1[a] <- fut_ec__[i-19]
  }
}
fut_ec_ <-
c(fut_ec_1,fut_ec_2,fut_ec_3,fut_ec_4,fut_ec_5,fut_ec_6,fut_ec_7,fut_ec_8,fut_ec_9,fut_ec_10,fut_ec_11,fut_ec_12,f
ut_ec_13,fut_ec_14,fut_ec_15,fut_ec_16,fut_ec_17,fut_ec_18,fut_ec_19,fut_ec_20)
fut_ec <- tapply( fut_ec_, (seq_along(fut_ec_)-1) %/% years, sum) # Future effects of CI for all years in time
horizon added together (for each of the simulations)
start_c <- 362083*scale # Start-up costs of Community Intervention for the whole of Malawi
annual_c <- (27250+2068997)*scale # Annual running costs of Community Intervention for the whole of Malawi
annualext_c <- 120067*scale # Annual external costs of Community Intervention for the whole of Malawi

```

```

fut_cc_ <- NULL
for (i in 1:length(cycle)) fut_cc_[i] <-c((annual_c + annualect_c)/((1+cdr)^i)) # Future costs of CI for each
year in time horizon
fut_cc <- start_c + tapply( fut_cc_, (seq_along(fut_cc_)-1) %/% years, sum) # Future costs of CI for all years
in time horizon added together (this is constant so needs to be replicated by the number of simulations in the
BCEA)

s_fm <- (s_f/2.25)*scale # DALYs averted per year by the Facility Intervention if scaled-up to the whole of
Malawi
fut_ef_ = NA*c(1:(length(s_fm)*length(cycle)))
fut_ef__ <- fut_ef_20 <- fut_ef_19 <- fut_ef_18 <- fut_ef_17 <- fut_ef_16 <- fut_ef_15 <- fut_ef_14 <- fut_ef_13
<- fut_ef_12 <- fut_ef_11 <- fut_ef_10 <- fut_ef_9 <- fut_ef_8 <- fut_ef_7 <- fut_ef_6 <- fut_ef_5 <- fut_ef_4 <-
fut_ef_3 <- fut_ef_2 <- fut_ef_1 <- NULL
for (a in 1:length(s_fm)) {
  for (i in 1:length(cycle)) fut_ef__[i] <-c(s_fm[a]/((1+edr)^i))
  fut_ef_20[a] <- fut_ef__[i]
}
for (a in 1:length(s_fm)) {
  for (i in 1:length(cycle)) fut_ef__[i] <-c(s_fm[a]/((1+edr)^i))
  fut_ef_19[a] <- fut_ef__[i-1]
}
for (a in 1:length(s_fm)) {
  for (i in 1:length(cycle)) fut_ef__[i] <-c(s_fm[a]/((1+edr)^i))
  fut_ef_18[a] <- fut_ef__[i-2]
}
for (a in 1:length(s_fm)) {
  for (i in 1:length(cycle)) fut_ef__[i] <-c(s_fm[a]/((1+edr)^i))
  fut_ef_17[a] <- fut_ef__[i-3]
}
for (a in 1:length(s_fm)) {
  for (i in 1:length(cycle)) fut_ef__[i] <-c(s_fm[a]/((1+edr)^i))
  fut_ef_16[a] <- fut_ef__[i-4]
}
for (a in 1:length(s_fm)) {
  for (i in 1:length(cycle)) fut_ef__[i] <-c(s_fm[a]/((1+edr)^i))
  fut_ef_15[a] <- fut_ef__[i-5]
}
for (a in 1:length(s_fm)) {
  for (i in 1:length(cycle)) fut_ef__[i] <-c(s_fm[a]/((1+edr)^i))
  fut_ef_14[a] <- fut_ef__[i-6]
}
for (a in 1:length(s_fm)) {
  for (i in 1:length(cycle)) fut_ef__[i] <-c(s_fm[a]/((1+edr)^i))
  fut_ef_13[a] <- fut_ef__[i-7]
}
for (a in 1:length(s_fm)) {
  for (i in 1:length(cycle)) fut_ef__[i] <-c(s_fm[a]/((1+edr)^i))
  fut_ef_12[a] <- fut_ef__[i-8]
}
for (a in 1:length(s_fm)) {
  for (i in 1:length(cycle)) fut_ef__[i] <-c(s_fm[a]/((1+edr)^i))
  fut_ef_11[a] <- fut_ef__[i-9]
}
for (a in 1:length(s_fm)) {
  for (i in 1:length(cycle)) fut_ef__[i] <-c(s_fm[a]/((1+edr)^i))
  fut_ef_10[a] <- fut_ef__[i-10]
}
for (a in 1:length(s_fm)) {
  for (i in 1:length(cycle)) fut_ef__[i] <-c(s_fm[a]/((1+edr)^i))
  fut_ef_9[a] <- fut_ef__[i-11]
}
for (a in 1:length(s_fm)) {
  for (i in 1:length(cycle)) fut_ef__[i] <-c(s_fm[a]/((1+edr)^i))
  fut_ef_8[a] <- fut_ef__[i-12]
}
for (a in 1:length(s_fm)) {
  for (i in 1:length(cycle)) fut_ef__[i] <-c(s_fm[a]/((1+edr)^i))
  fut_ef_7[a] <- fut_ef__[i-13]
}
for (a in 1:length(s_fm)) {
  for (i in 1:length(cycle)) fut_ef__[i] <-c(s_fm[a]/((1+edr)^i))
  fut_ef_6[a] <- fut_ef__[i-14]
}
for (a in 1:length(s_fm)) {
  for (i in 1:length(cycle)) fut_ef__[i] <-c(s_fm[a]/((1+edr)^i))
  fut_ef_5[a] <- fut_ef__[i-15]
}
for (a in 1:length(s_fm)) {
  for (i in 1:length(cycle)) fut_ef__[i] <-c(s_fm[a]/((1+edr)^i))
}

```

```

    fut_ef_4[a] <- fut_ef__[i-16]
  }
  for (a in 1:length(s_fm)) {
    for (i in 1:length(cycle)) fut_ef__[i] <-c(s_fm[a]/((1+edr)^i))
    fut_ef_3[a] <- fut_ef__[i-17]
  }
  for (a in 1:length(s_fm)) {
    for (i in 1:length(cycle)) fut_ef__[i] <-c(s_fm[a]/((1+edr)^i))
    fut_ef_2[a] <- fut_ef__[i-18]
  }
  for (a in 1:length(s_fm)) {
    for (i in 1:length(cycle)) fut_ef__[i] <-c(s_fm[a]/((1+edr)^i))
    fut_ef_1[a] <- fut_ef__[i-19]
  }
  fut_ef_ <-
  c(fut_ef_1,fut_ef_2,fut_ef_3,fut_ef_4,fut_ef_5,fut_ef_6,fut_ef_7,fut_ef_8,fut_ef_9,fut_ef_10,fut_ef_11,fut_ef_12,fut_ef_13,fut_ef_14,fut_ef_15,fut_ef_16,fut_ef_17,fut_ef_18,fut_ef_19,fut_ef_20)
  fut_ef <- tapply( fut_ef_, (seq_along(fut_ef_)-1) %/% years, sum) # Future effects of CI for all years in time horizon added together (for each of the simulations)
  start_f <- 362860*scale # Start-up costs of Facility Intervention for the whole of Malawi
  annual_f <- (25328+2026811)*scale # Annual running costs of Facility Intervention for the whole of Malawi
  annualext_f <- 272017*scale # Annual external costs of Facility Intervention for the whole of Malawi
  fut_cf_ <- NULL
  for (i in 1:length(cycle)) fut_cf_[i] <-c((annual_f + annualext_f)/((1+edr)^i)) # Future costs of FI for each year in time horizon
  fut_cf <- start_f + tapply( fut_cf_, (seq_along(fut_cf_)-1) %/% years, sum) # Future costs of FI for all years in time horizon added together, for each of the simulations

  s_fc <- (bs_fc*86.0*2 + ms_fc*53.27*2)/2.25 #DALYs averted per year by FICI, doubled so the same as CI or FI two-arm trial
  s_fcm <- s_fc*scale # DALYs saved by the combined Facility and Community Intervention if scaled-up to the whole of Malawi
  fut_efc_<-NA*c(1:(length(s_fcm)*length(cycle)))
  fut_efc__ <- fut_efc_20 <- fut_efc_19 <- fut_efc_18 <- fut_efc_17 <- fut_efc_16 <- fut_efc_15 <- fut_efc_14 <- fut_efc_13 <- fut_efc_12 <- fut_efc_11 <- fut_efc_10 <- fut_efc_9 <- fut_efc_8 <- fut_efc_7 <- fut_efc_6 <- fut_efc_5 <- fut_efc_4 <- fut_efc_3 <- fut_efc_2 <- fut_efc_1 <- NULL
  for (a in 1:length(s_fcm)) {
    for (i in 1:length(cycle)) fut_efc__[i] <-c(s_fcm[a]/((1+edr)^i))
    fut_efc_20[a] <- fut_efc__[i]
  }
  for (a in 1:length(s_fcm)) {
    for (i in 1:length(cycle)) fut_efc__[i] <-c(s_fcm[a]/((1+edr)^i))
    fut_efc_19[a] <- fut_efc__[i-1]
  }
  for (a in 1:length(s_fcm)) {
    for (i in 1:length(cycle)) fut_efc__[i] <-c(s_fcm[a]/((1+edr)^i))
    fut_efc_18[a] <- fut_efc__[i-2]
  }
  for (a in 1:length(s_fcm)) {
    for (i in 1:length(cycle)) fut_efc__[i] <-c(s_fcm[a]/((1+edr)^i))
    fut_efc_17[a] <- fut_efc__[i-3]
  }
  for (a in 1:length(s_fcm)) {
    for (i in 1:length(cycle)) fut_efc__[i] <-c(s_fcm[a]/((1+edr)^i))
    fut_efc_16[a] <- fut_efc__[i-4]
  }
  for (a in 1:length(s_fcm)) {
    for (i in 1:length(cycle)) fut_efc__[i] <-c(s_fcm[a]/((1+edr)^i))
    fut_efc_15[a] <- fut_efc__[i-5]
  }
  for (a in 1:length(s_fcm)) {
    for (i in 1:length(cycle)) fut_efc__[i] <-c(s_fcm[a]/((1+edr)^i))
    fut_efc_14[a] <- fut_efc__[i-6]
  }
  for (a in 1:length(s_fcm)) {
    for (i in 1:length(cycle)) fut_efc__[i] <-c(s_fcm[a]/((1+edr)^i))
    fut_efc_13[a] <- fut_efc__[i-7]
  }
  for (a in 1:length(s_fcm)) {
    for (i in 1:length(cycle)) fut_efc__[i] <-c(s_fcm[a]/((1+edr)^i))
    fut_efc_12[a] <- fut_efc__[i-8]
  }
  for (a in 1:length(s_fcm)) {
    for (i in 1:length(cycle)) fut_efc__[i] <-c(s_fcm[a]/((1+edr)^i))
    fut_efc_11[a] <- fut_efc__[i-9]
  }
  for (a in 1:length(s_fcm)) {
    for (i in 1:length(cycle)) fut_efc__[i] <-c(s_fcm[a]/((1+edr)^i))
    fut_efc_10[a] <- fut_efc__[i-10]
  }

```

```

}
for (a in 1:length(s_fcm)) {
  for (i in 1:length(cycle)) fut_efc__[i] <-c(s_fcm[a]/((1+edr)^i))
  fut_efc_9[a] <- fut_efc__[i-11]
}
for (a in 1:length(s_fcm)) {
  for (i in 1:length(cycle)) fut_efc__[i] <-c(s_fcm[a]/((1+edr)^i))
  fut_efc_8[a] <- fut_efc__[i-12]
}
for (a in 1:length(s_fcm)) {
  for (i in 1:length(cycle)) fut_efc__[i] <-c(s_fcm[a]/((1+edr)^i))
  fut_efc_7[a] <- fut_efc__[i-13]
}
for (a in 1:length(s_fcm)) {
  for (i in 1:length(cycle)) fut_efc__[i] <-c(s_fcm[a]/((1+edr)^i))
  fut_efc_6[a] <- fut_efc__[i-14]
}
for (a in 1:length(s_fcm)) {
  for (i in 1:length(cycle)) fut_efc__[i] <-c(s_fcm[a]/((1+edr)^i))
  fut_efc_5[a] <- fut_efc__[i-15]
}
for (a in 1:length(s_fcm)) {
  for (i in 1:length(cycle)) fut_efc__[i] <-c(s_fcm[a]/((1+edr)^i))
  fut_efc_4[a] <- fut_efc__[i-16]
}
for (a in 1:length(s_fcm)) {
  for (i in 1:length(cycle)) fut_efc__[i] <-c(s_fcm[a]/((1+edr)^i))
  fut_efc_3[a] <- fut_efc__[i-17]
}
for (a in 1:length(s_fcm)) {
  for (i in 1:length(cycle)) fut_efc__[i] <-c(s_fcm[a]/((1+edr)^i))
  fut_efc_2[a] <- fut_efc__[i-18]
}
for (a in 1:length(s_fcm)) {
  for (i in 1:length(cycle)) fut_efc__[i] <-c(s_fcm[a]/((1+edr)^i))
  fut_efc_1[a] <- fut_efc__[i-19]
}
fut_efc_ <-
c(fut_efc_1,fut_efc_2,fut_efc_3,fut_efc_4,fut_efc_5,fut_efc_6,fut_efc_7,fut_efc_8,fut_efc_9,fut_efc_10,fut_efc_11,
fut_efc_12,fut_efc_13,fut_efc_14,fut_efc_15,fut_efc_16,fut_efc_17,fut_efc_18,fut_efc_19,fut_efc_20)
fut_efc <- tapply( fut_efc_, (seq_along(fut_efc_)-1) %/% years, sum) # Future effects of FICI for all years in
time horizon added together, for each of the simulations
start_fc <- 362472*2*scale # Start-up costs of the combined Facility and Community Intervention for the whole of
Malawi
annual_fc <- (26289+2047904)*2*scale # Annual running costs of the combined Facility and Community Intervention
for the whole of Malawi
annualext_fc <- 196042*2*scale # Annual external costs of FICI for the whole of Malawi
fut_cfc_ <- NULL
for (i in 1:length(cycle)) fut_cfc_[i] <-c((annual_fc + annualext_fc)/((1+edr)^i)) # Future costs of FI for
each year in time horizon
fut_cfc <- start_fc + tapply( fut_cfc_, (seq_along(fut_cfc_)-1) %/% years, sum) # Future costs of FICI for all
years in time horizon added together, for each of the simulations

# Future scale-up: Community Intervention (CI) vs Facility Intervention (FI) vs. combined FICI
e4 <- c4 <- matrix(NA,model$BUGSoutput$n.sims,3)
e4 <- matrix(c(fut_ec,fut_ef,fut_efc),model$BUGSoutput$n.sims,3) # effects - see lines 142, 151 and 161 above
c4 <- matrix(c(rep(fut_cc,model$BUGSoutput$n.sims),rep(fut_cf,model$BUGSoutput$n.sims),rep(fut_cfc,model
$BUGSoutput$n.sims)),model$BUGSoutput$n.sims,3) # costs - see lines 147, 156 and 166 above
future <- bcea(e=e4,c=c4,ref=1,interventions=treats3,Kmax=2500)
layout(matrix(1:4,2,2)) #so the four health economic analysis plots from the following commands are on one page
ceplane.plot(future,comparison=2,wdp=779.8) # Cost-effectiveness plane
eib.plot(future) # Expected Incremental Benefit
ceac.plot(future) # Cost-effectiveness Acceptability Curve (prob cost-effective by WTP)
evi.plot(future) # Expected value of information by willingness to pay
quartz.save("plots_future_20_003_000.pdf", type="pdf")
print("time horizon in years")
years
print("cost discount rate")
cdr
print("effects discount rate")
edr
summary(future,wdp=780)

# ... Future scale-up scenarios 20-27 omitted to save space, the code is identical to that for Future scale-up
scenario 19 above, except for changing the years cdr and edr inputs in the first 3 lines and the
quartz.save("plots_future_X_XXX_XXX.pdf" command eight lines from the end

sink()

```

# MaiKhanda\_final\_log\_.txt output from MaiKhanda\_final\_submit.R 3rd Dec 10:12

The downloaded binary packages are in  
/var/folders/ps/63xh8zd90wbdcl2v8l10\_npc0000gq/T/RtmpavJqyt/downloaded\_packages

The downloaded binary packages are in  
/var/folders/ps/63xh8zd90wbdcl2v8l10\_npc0000gq/T/RtmpavJqyt/downloaded\_packages

Compiling model graph  
Resolving undeclared variables  
Allocating nodes  
Graph Size: 702

Initializing model

Inference for Bugs model at "/Users/timothycolbourn/Documents/Papers/MaiKhanda CEA paper/JAGS revised/MKmodel\_final.txt", fit using jags,  
2 chains, each with 510000 iterations (first 10000 discarded), n.thin = 10  
n.sims = 100000 iterations saved

|          | mu.vect    | sd.vect   | 2.5%       | 50%        | 97.5%      | Rhat  | n.eff  |
|----------|------------|-----------|------------|------------|------------|-------|--------|
| bs_c     | 102352.276 | 336.338   | 101673.738 | 102361.079 | 102978.330 | 1.001 | 100000 |
| bs_f     | 101621.174 | 368.950   | 100873.777 | 101630.223 | 102316.649 | 1.001 | 33000  |
| bs_nc    | 101580.075 | 77.652    | 101427.000 | 101580.000 | 101731.000 | 1.001 | 76000  |
| bs_nf    | 101329.914 | 79.146    | 101175.000 | 101330.000 | 101485.000 | 1.001 | 100000 |
| d_c      | 67360.641  | 29006.136 | 8807.651   | 68124.694  | 121507.556 | 1.001 | 100000 |
| d_f      | 19900.924  | 32103.889 | -44768.651 | 20638.361  | 80586.481  | 1.001 | 21000  |
| db_c     | 66409.268  | 28324.616 | 9415.513   | 67146.479  | 119034.719 | 1.001 | 100000 |
| db_f     | 25048.424  | 31049.592 | -37739.441 | 25770.955  | 83762.741  | 1.001 | 34000  |
| dm_c     | 951.373    | 6523.040  | -14369.912 | 1835.218   | 11169.105  | 1.001 | 57000  |
| dm_f     | -5147.499  | 8559.492  | -25540.628 | -3935.924  | 7883.364   | 1.004 | 480    |
| lb_c     | 772.201    | 329.356   | 109.483    | 780.773    | 1384.125   | 1.001 | 100000 |
| lb_f     | 291.261    | 361.042   | -438.831   | 299.662    | 973.985    | 1.001 | 34000  |
| lm_c     | 17.859     | 122.452   | -269.756   | 34.451     | 209.670    | 1.001 | 57000  |
| lm_f     | -96.630    | 160.681   | -479.456   | -73.886    | 147.989    | 1.004 | 480    |
| ms_c     | 107605.037 | 123.931   | 107313.273 | 107622.046 | 107797.303 | 1.001 | 64000  |
| ms_f     | 107477.274 | 162.687   | 107089.672 | 107500.481 | 107724.933 | 1.004 | 500    |
| ms_nc    | 107587.178 | 20.335    | 107547.000 | 107587.000 | 107626.000 | 1.001 | 100000 |
| ms_nf    | 107573.905 | 20.467    | 107533.000 | 107574.000 | 107614.000 | 1.001 | 37000  |
| orb_c    | 0.873      | 0.054     | 0.774      | 0.872      | 0.982      | 1.001 | 100000 |
| orb_f    | 0.954      | 0.057     | 0.846      | 0.952      | 1.070      | 1.001 | 33000  |
| orm_c    | 0.957      | 0.298     | 0.494      | 0.916      | 1.657      | 1.001 | 30000  |
| orm_f    | 1.228      | 0.379     | 0.652      | 1.175      | 2.135      | 1.004 | 430    |
| deviance | 509.790    | 274.274   | 500.653    | 507.739    | 519.946    | 1.019 | 6700   |

For each parameter, n.eff is a crude measure of effective sample size,  
and Rhat is the potential scale reduction factor (at convergence, Rhat=1).

DIC info (using the rule,  $pD = \text{var}(\text{deviance})/2$ )  
 $pD = 37613.2$  and  $DIC = 38123.0$   
DIC is an estimate of expected predictive error (lower deviance is better).  
[[1]]

Quantile (q) = 0.025  
Accuracy (r) = +/- 0.005  
Probability (s) = 0.95

|          | Burn-in (M) | Total (N) | Lower bound (Nmin) | Dependence factor (I) |
|----------|-------------|-----------|--------------------|-----------------------|
| bs_c     | 60          | 90720     | 3746               | 24.2                  |
| bs_f     | 60          | 86860     | 3746               | 23.2                  |
| bs_nc    | 20          | 38160     | 3746               | 10.2                  |
| bs_nf    | 20          | 37480     | 3746               | 10.0                  |
| d_c      | 60          | 90920     | 3746               | 24.3                  |
| d_f      | 80          | 94800     | 3746               | 25.3                  |
| db_c     | 60          | 87780     | 3746               | 23.4                  |
| db_f     | 80          | 91840     | 3746               | 24.5                  |
| deviance | 180         | 240360    | 3746               | 64.2                  |
| dm_c     | 910         | 1058070   | 3746               | 282.0                 |
| dm_f     | 1080        | 1107540   | 3746               | 296.0                 |
| lb_c     | 60          | 87780     | 3746               | 23.4                  |
| lb_f     | 80          | 91840     | 3746               | 24.5                  |
| lm_c     | 910         | 1058070   | 3746               | 282.0                 |
| lm_f     | 1080        | 1107540   | 3746               | 296.0                 |
| ms_c     | 840         | 1026480   | 3746               | 274.0                 |
| ms_f     | 990         | 972090    | 3746               | 260.0                 |
| ms_nc    | 20          | 41880     | 3746               | 11.2                  |
| ms_nf    | 10          | 37530     | 3746               | 10.0                  |
| orb_c    | 60          | 90160     | 3746               | 24.1                  |
| orb_f    | 80          | 91960     | 3746               | 24.5                  |
| orm_c    | 1430        | 1476530   | 3746               | 394.0                 |
| orm_f    | 900         | 944800    | 3746               | 252.0                 |

[[2]]

Quantile (q) = 0.025  
 Accuracy (r) = +/- 0.005  
 Probability (s) = 0.95

|          | Burn-in<br>(M) | Total<br>(N) | Lower bound<br>(Nmin) | Dependence<br>factor (I) |
|----------|----------------|--------------|-----------------------|--------------------------|
| bs_c     | 60             | 86700        | 3746                  | 23.1                     |
| bs_f     | 60             | 89360        | 3746                  | 23.9                     |
| bs_nc    | 10             | 38720        | 3746                  | 10.3                     |
| bs_nf    | 20             | 38510        | 3746                  | 10.3                     |
| d_c      | 80             | 98980        | 3746                  | 26.4                     |
| d_f      | 60             | 91900        | 3746                  | 24.5                     |
| db_c     | 60             | 90760        | 3746                  | 24.2                     |
| db_f     | 60             | 96760        | 3746                  | 25.8                     |
| deviance | 210            | 289240       | 3746                  | 77.2                     |
| dm_c     | 1120           | 1281840      | 3746                  | 342.0                    |
| dm_f     | 840            | 943460       | 3746                  | 252.0                    |
| lb_c     | 60             | 90760        | 3746                  | 24.2                     |
| lb_f     | 60             | 96760        | 3746                  | 25.8                     |
| lm_c     | 1120           | 1281840      | 3746                  | 342.0                    |
| lm_f     | 840            | 943460       | 3746                  | 252.0                    |
| ms_c     | 800            | 878400       | 3746                  | 234.0                    |
| ms_f     | 910            | 987350       | 3746                  | 264.0                    |
| ms_nc    | 20             | 39660        | 3746                  | 10.6                     |
| ms_nf    | 20             | 38060        | 3746                  | 10.2                     |
| orb_c    | 60             | 91020        | 3746                  | 24.3                     |
| orb_f    | 90             | 129420       | 3746                  | 34.5                     |
| orm_c    | 1320           | 1526400      | 3746                  | 407.0                    |
| orm_f    | 1080           | 1112940      | 3746                  | 297.0                    |

Iterations = 10001:509991  
 Thinning interval = 10  
 Number of chains = 2  
 Sample size per chain = 50000

1. Empirical mean and standard deviation for each variable,  
 plus standard error of the mean:

|          | Mean       | SD        | Naive SE  | Time-series SE |
|----------|------------|-----------|-----------|----------------|
| bs_c     | 1.024e+05  | 3.363e+02 | 1.064e+00 | 2.098e+00      |
| bs_f     | 1.016e+05  | 3.690e+02 | 1.167e+00 | 2.319e+00      |
| bs_nc    | 1.016e+05  | 7.765e+01 | 2.456e-01 | 2.456e-01      |
| bs_nf    | 1.013e+05  | 7.915e+01 | 2.503e-01 | 2.513e-01      |
| d_c      | 6.736e+04  | 2.901e+04 | 9.173e+01 | 2.288e+02      |
| d_f      | 1.990e+04  | 3.210e+04 | 1.015e+02 | 3.015e+02      |
| db_c     | 6.641e+04  | 2.832e+04 | 8.957e+01 | 1.807e+02      |
| db_f     | 2.505e+04  | 3.105e+04 | 9.819e+01 | 1.970e+02      |
| deviance | 5.098e+02  | 2.743e+02 | 8.673e-01 | 1.030e+00      |
| dm_c     | 9.514e+02  | 6.523e+03 | 2.063e+01 | 2.049e+02      |
| dm_f     | -5.147e+03 | 8.559e+03 | 2.707e+01 | 2.643e+02      |
| lb_c     | 7.722e+02  | 3.294e+02 | 1.042e+00 | 2.101e+00      |
| lb_f     | 2.913e+02  | 3.610e+02 | 1.142e+00 | 2.291e+00      |
| lm_c     | 1.786e+01  | 1.225e+02 | 3.872e-01 | 3.847e+00      |
| lm_f     | -9.663e+01 | 1.607e+02 | 5.081e-01 | 4.962e+00      |
| ms_c     | 1.076e+05  | 1.239e+02 | 3.919e-01 | 3.884e+00      |
| ms_f     | 1.075e+05  | 1.627e+02 | 5.145e-01 | 4.995e+00      |
| ms_nc    | 1.076e+05  | 2.033e+01 | 6.430e-02 | 6.430e-02      |
| ms_nf    | 1.076e+05  | 2.047e+01 | 6.472e-02 | 6.472e-02      |
| orb_c    | 8.733e-01  | 5.390e-02 | 1.704e-04 | 3.430e-04      |
| orb_f    | 9.538e-01  | 5.740e-02 | 1.815e-04 | 3.640e-04      |
| orm_c    | 9.570e-01  | 2.976e-01 | 9.410e-04 | 9.251e-03      |
| orm_f    | 1.228e+00  | 3.790e-01 | 1.199e-03 | 1.176e-02      |

2. Quantiles for each variable:

|          | 2.5%       | 25%        | 50%        | 75%       | 97.5%     |
|----------|------------|------------|------------|-----------|-----------|
| bs_c     | 1.017e+05  | 1.021e+05  | 1.024e+05  | 1.026e+05 | 1.030e+05 |
| bs_f     | 1.009e+05  | 1.014e+05  | 1.016e+05  | 1.019e+05 | 1.023e+05 |
| bs_nc    | 1.014e+05  | 1.015e+05  | 1.016e+05  | 1.016e+05 | 1.017e+05 |
| bs_nf    | 1.012e+05  | 1.013e+05  | 1.013e+05  | 1.014e+05 | 1.015e+05 |
| d_c      | 8.808e+03  | 4.842e+04  | 6.812e+04  | 8.727e+04 | 1.215e+05 |
| d_f      | -4.477e+04 | -1.213e+03 | 2.064e+04  | 4.175e+04 | 8.059e+04 |
| db_c     | 9.416e+03  | 4.786e+04  | 6.715e+04  | 8.586e+04 | 1.190e+05 |
| db_f     | -3.774e+04 | 4.530e+03  | 2.577e+04  | 4.624e+04 | 8.376e+04 |
| deviance | 5.007e+02  | 5.048e+02  | 5.077e+02  | 5.113e+02 | 5.199e+02 |
| dm_c     | -1.437e+04 | -2.689e+03 | 1.835e+03  | 5.568e+03 | 1.117e+04 |
| dm_f     | -2.554e+04 | -9.837e+03 | -3.936e+03 | 9.889e+02 | 7.883e+03 |
| lb_c     | 1.095e+02  | 5.565e+02  | 7.808e+02  | 9.984e+02 | 1.384e+03 |
| lb_f     | -4.388e+02 | 5.268e+01  | 2.997e+02  | 5.376e+02 | 9.740e+02 |
| lm_c     | -2.698e+02 | -5.049e+01 | 3.445e+01  | 1.045e+02 | 2.097e+02 |
| lm_f     | -4.795e+02 | -1.847e+02 | -7.389e+01 | 1.856e+01 | 1.480e+02 |
| ms_c     | 1.073e+05  | 1.075e+05  | 1.076e+05  | 1.077e+05 | 1.078e+05 |

```

ms_f      1.071e+05  1.074e+05  1.075e+05  1.076e+05  1.077e+05
ms_nc     1.075e+05  1.076e+05  1.076e+05  1.076e+05  1.076e+05
ms_nf     1.075e+05  1.076e+05  1.076e+05  1.076e+05  1.076e+05
orb_c     7.740e-01  8.363e-01  8.717e-01  9.083e-01  9.819e-01
orb_f     8.459e-01  9.145e-01  9.523e-01  9.916e-01  1.070e+00
orm_c     4.943e-01  7.454e-01  9.160e-01  1.123e+00  1.657e+00
orm_f     6.517e-01  9.563e-01  1.175e+00  1.436e+00  2.135e+00

```

```

quartz
  2

```

Cost-effectiveness analysis summary

Reference intervention: Community Intervention  
 Comparator intervention: do nothing

Optimal decision: choose do nothing for  $k < 80$  and Community Intervention for  $k \geq 80$

Analysis for willingness to pay parameter  $k = 780$

```

                Expected utility
do nothing      11284303221
Community Intervention  11331495730

```

```

                EIB    CEAC    ICER
Community Intervention vs do nothing  47192509  0.97832  79.405

```

Optimal intervention (max expected utility) for  $k=780$ : Community Intervention

```

EVPI 210423
quartz
  2

```

Cost-effectiveness analysis summary

Reference intervention: Facility Intervention  
 Comparator intervention: do nothing

Optimal decision: choose do nothing for  $k < 285$  and Facility Intervention for  $k \geq 285$

Analysis for willingness to pay parameter  $k = 780$

```

                Expected utility
do nothing      11266970900
Facility Intervention  11276901409

```

```

                EIB    CEAC    ICER
Facility Intervention vs do nothing  9930509  0.66163  281

```

Optimal intervention (max expected utility) for  $k=780$ : Facility Intervention

```

EVPI 5851010
quartz
  2

```

Cost-effectiveness analysis summary

Reference intervention: Community Intervention  
 Comparator intervention: Facility Intervention

Community Intervention dominates for all  $k$  in  $[0 - 2500]$

Analysis for willingness to pay parameter  $k = 780$

```

                Expected utility
Community Intervention  11331495730
Facility Intervention  11276901409

```

```

                EIB    CEAC    ICER
Community Intervention vs Facility Intervention  54594321  0.94599  -3.4934

```

Optimal intervention (max expected utility) for  $k=780$ : Community Intervention

```

EVPI 793159
Compiling model graph
  Resolving undeclared variables
  Allocating nodes
  Graph Size: 357

```

Initializing model



Inference for Bugs model at "/Users/timothycolbourn/Documents/Papers/MaiKhanda CEA paper/JAGS revised/MKmodelFC\_final.txt", fit using jags,  
 2 chains, each with 510000 iterations (first 10000 discarded), n.thin = 10  
 n.sims = 100000 iterations saved

|          | mu.vect   | sd.vect   | 2.5%       | 50%       | 97.5%      | Rhat  | n.eff  |
|----------|-----------|-----------|------------|-----------|------------|-------|--------|
| bs_con   | 50862.940 | 54.468    | 50756.000  | 50863.000 | 50969.000  | 1.001 | 46000  |
| bs_fc    | 51338.360 | 223.893   | 50873.579  | 51346.994 | 51750.893  | 1.001 | 21000  |
| d_fc     | 37590.203 | 20198.564 | -4641.764  | 38498.852 | 74617.980  | 1.001 | 3100   |
| d_fc_    | 75180.406 | 40397.128 | -9283.528  | 76997.703 | 149235.960 | 1.001 | 3100   |
| db_fc    | 40886.076 | 18860.691 | 1982.103   | 41544.463 | 75674.721  | 1.001 | 29000  |
| db_fc_   | 81772.153 | 37721.381 | 3964.205   | 83088.927 | 151349.441 | 1.001 | 29000  |
| dm_fc    | -3295.873 | 7298.995  | -21134.687 | -1728.280 | 5950.436   | 1.003 | 830    |
| dm_fc_   | -6591.747 | 14597.989 | -42269.374 | -3456.560 | 11900.872  | 1.003 | 830    |
| lb_fc    | 475.419   | 219.310   | 23.048     | 483.075   | 879.939    | 1.001 | 29000  |
| lb_fc_   | 950.839   | 438.621   | 46.095     | 966.150   | 1759.877   | 1.001 | 29000  |
| lm_fc    | -61.871   | 137.019   | -396.747   | -32.444   | 111.703    | 1.003 | 830    |
| lm_fc_   | -123.742  | 274.038   | -793.493   | -64.888   | 223.407    | 1.003 | 830    |
| ms_con   | 53782.118 | 14.783    | 53753.000  | 53782.000 | 53811.000  | 1.001 | 100000 |
| ms_fc    | 53720.247 | 138.299   | 53383.775  | 53749.854 | 53894.724  | 1.003 | 840    |
| orb_fc   | 0.841     | 0.073     | 0.707      | 0.838     | 0.992      | 1.001 | 28000  |
| orm_fc   | 1.287     | 0.635     | 0.488      | 1.150     | 2.839      | 1.003 | 600    |
| deviance | 258.437   | 64.142    | 251.107    | 257.322   | 269.176    | 1.001 | 8100   |

For each parameter, n.eff is a crude measure of effective sample size,  
 and Rhat is the potential scale reduction factor (at convergence, Rhat=1).

DIC info (using the rule,  $pD = \text{var}(\text{deviance})/2$ )  
 $pD = 2057.1$  and  $DIC = 2315.5$   
 DIC is an estimate of expected predictive error (lower deviance is better).  
 [[1]]

Quantile (q) = 0.025  
 Accuracy (r) = +/- 0.005  
 Probability (s) = 0.95

|          | Burn-in (M) | Total (N) | Lower bound (Nmin) | Dependence factor (I) |
|----------|-------------|-----------|--------------------|-----------------------|
| bs_con   | 20          | 39230     | 3746               | 10.5                  |
| bs_fc    | 60          | 89260     | 3746               | 23.8                  |
| d_fc     | 180         | 267960    | 3746               | 71.5                  |
| d_fc_    | 180         | 267960    | 3746               | 71.5                  |
| db_fc    | 60          | 89260     | 3746               | 23.8                  |
| db_fc_   | 60          | 89260     | 3746               | 23.8                  |
| deviance | 200         | 255800    | 3746               | 68.3                  |
| dm_fc    | 990         | 1039610   | 3746               | 278.0                 |
| dm_fc_   | 990         | 1039610   | 3746               | 278.0                 |
| lb_fc    | 60          | 89260     | 3746               | 23.8                  |
| lb_fc_   | 60          | 89260     | 3746               | 23.8                  |
| lm_fc    | 990         | 1039610   | 3746               | 278.0                 |
| lm_fc_   | 990         | 1039610   | 3746               | 278.0                 |
| ms_con   | 10          | 41710     | 3746               | 11.1                  |
| ms_fc    | 990         | 968880    | 3746               | 259.0                 |
| orb_fc   | 60          | 90560     | 3746               | 24.2                  |
| orm_fc   | 960         | 1050720   | 3746               | 280.0                 |

[[2]]

Quantile (q) = 0.025  
 Accuracy (r) = +/- 0.005  
 Probability (s) = 0.95

|          | Burn-in (M) | Total (N) | Lower bound (Nmin) | Dependence factor (I) |
|----------|-------------|-----------|--------------------|-----------------------|
| bs_con   | 20          | 38760     | 3746               | 10.3                  |
| bs_fc    | 80          | 97620     | 3746               | 26.1                  |
| d_fc     | 120         | 138270    | 3746               | 36.9                  |
| d_fc_    | 120         | 138270    | 3746               | 36.9                  |
| db_fc    | 80          | 97600     | 3746               | 26.1                  |
| db_fc_   | 80          | 97600     | 3746               | 26.1                  |
| deviance | 180         | 261540    | 3746               | 69.8                  |
| dm_fc    | 1200        | 1454600   | 3746               | 388.0                 |
| dm_fc_   | 1200        | 1454600   | 3746               | 388.0                 |
| lb_fc    | 80          | 97600     | 3746               | 26.1                  |
| lb_fc_   | 80          | 97600     | 3746               | 26.1                  |
| lm_fc    | 1200        | 1454600   | 3746               | 388.0                 |
| lm_fc_   | 1200        | 1454600   | 3746               | 388.0                 |
| ms_con   | 10          | 40440     | 3746               | 10.8                  |
| ms_fc    | 1200        | 1289400   | 3746               | 344.0                 |
| orb_fc   | 60          | 91300     | 3746               | 24.4                  |
| orm_fc   | 900         | 932100    | 3746               | 249.0                 |

Iterations = 10001:509991  
 Thinning interval = 10  
 Number of chains = 2  
 Sample size per chain = 50000

1. Empirical mean and standard deviation for each variable,  
 plus standard error of the mean:

|          | Mean       | SD          | Naive SE    | Time-series SE |
|----------|------------|-------------|-------------|----------------|
| bs_con   | 50862.9402 | 54.46801    | 0.1722430   | 0.1744591      |
| bs_fc    | 51338.3597 | 223.89290   | 0.7080115   | 1.4048950      |
| d_fc     | 37590.2028 | 20198.56425 | 63.8734685  | 236.9286552    |
| d_fc_    | 75180.4056 | 40397.12850 | 127.7469370 | 473.8573103    |
| db_fc    | 40886.0763 | 18860.69058 | 59.6427405  | 119.9372858    |
| db_fc_   | 81772.1526 | 37721.38116 | 119.2854809 | 239.8745716    |
| deviance | 258.4367   | 64.14191    | 0.2028345   | 0.2908747      |
| dm_fc    | -3295.8735 | 7298.99468  | 23.0814478  | 241.7167825    |
| dm_fc_   | -6591.7470 | 14597.98936 | 46.1628956  | 483.4335650    |
| lb_fc    | 475.4195   | 219.31036   | 0.6935202   | 1.3946196      |
| lb_fc_   | 950.8390   | 438.62071   | 1.3870405   | 2.7892392      |
| lm_fc    | -61.8711   | 137.01886   | 0.4332917   | 4.5375780      |
| lm_fc_   | -123.7422  | 274.03772   | 0.8665834   | 9.0751561      |
| ms_con   | 53782.1179 | 14.78296    | 0.0467478   | 0.0465820      |
| ms_fc    | 53720.2468 | 138.29911   | 0.4373402   | 4.5709052      |
| orb_fc   | 0.8409     | 0.07287     | 0.0002304   | 0.0004641      |
| orm_fc   | 1.2869     | 0.63451     | 0.0020065   | 0.0215007      |

2. Quantiles for each variable:

|          | 2.5%        | 25%         | 50%       | 75%        | 97.5%       |
|----------|-------------|-------------|-----------|------------|-------------|
| bs_con   | 50756.0000  | 50826.0000  | 50863.000 | 50900.000  | 50969.0000  |
| bs_fc    | 50873.5789  | 51193.7442  | 51346.994 | 51494.207  | 51750.8933  |
| d_fc     | -4641.7638  | 24695.1064  | 38498.852 | 51591.503  | 74617.9801  |
| d_fc_    | -9283.5275  | 49390.2129  | 76997.703 | 103183.005 | 149235.9602 |
| db_fc    | 1982.1025   | 28624.4984  | 41544.463 | 53944.712  | 75674.7206  |
| db_fc_   | 3964.2050   | 57248.9968  | 83088.927 | 107889.423 | 151349.4412 |
| deviance | 251.1071    | 254.6414    | 257.322   | 260.585    | 269.1764    |
| dm_fc    | -21134.6871 | -6462.9401  | -1728.280 | 1628.723   | 5950.4359   |
| dm_fc_   | -42269.3742 | -12925.8801 | -3456.560 | 3257.446   | 11900.8718  |
| lb_fc    | 23.0477     | 332.8430    | 483.075   | 627.264    | 879.9386    |
| lb_fc_   | 46.0954     | 665.6860    | 966.150   | 1254.528   | 1759.8772   |
| lm_fc    | -396.7465   | -121.3242   | -32.444   | 30.575     | 111.7033    |
| lm_fc_   | -793.4930   | -242.6484   | -64.888   | 61.150     | 223.4066    |
| ms_con   | 53753.0000  | 53772.0000  | 53782.000 | 53792.000  | 53811.0000  |
| ms_fc    | 53383.7752  | 53660.0125  | 53749.854 | 53814.128  | 53894.7242  |
| orb_fc   | 0.7073      | 0.7902      | 0.838     | 0.888      | 0.9922      |
| orm_fc   | 0.4877      | 0.8587      | 1.150     | 1.564      | 2.8393      |

quartz  
2

Cost-effectiveness analysis summary

Reference intervention: Facility & Community Interventions  
 Comparator intervention: do nothing

Optimal decision: choose do nothing for k<150 and Facility & Community Interventions for k>=150

Analysis for willingness to pay parameter k = 780

|                                    | Expected utility |
|------------------------------------|------------------|
| do nothing                         | 5646565298       |
| Facility & Community Interventions | 5670415155       |

|                                                  | EIB      | CEAC    | ICER   |
|--------------------------------------------------|----------|---------|--------|
| Facility & Community Interventions vs do nothing | 23849857 | 0.92922 | 145.53 |

Optimal intervention (max expected utility) for k=780: Facility & Community Interventions

EVPI 598177  
quartz  
2

Cost-effectiveness analysis summary

Reference intervention: Community Intervention  
 Comparator intervention(s): Facility Intervention  
 : FICI

Optimal decision: choose Community Intervention for k<295 and FICI for k>=295

Analysis for willingness to pay parameter k = 780

|                        | Expected utility |
|------------------------|------------------|
| Community Intervention | 11331495730      |
| Facility Intervention  | 11276901409      |
| FICI                   | 11340830310      |

|                                                 | EIB      | CEAC    | ICER     |
|-------------------------------------------------|----------|---------|----------|
| Community Intervention vs Facility Intervention | 54594321 | 0.94599 | -3.4934  |
| Community Intervention vs FICI                  | -9334580 | 0.39826 | 292.2212 |

Optimal intervention (max expected utility) for k=780: FICI

EVPI 11708726  
quartz  
2

Cost-effectiveness analysis summary

Reference intervention: Facility Intervention  
Comparator intervention(s): Community Intervention  
: FICI

Optimal decision: choose Community Intervention for k<295 and FICI for k>=295

Analysis for willingness to pay parameter k = 780

|                        | Expected utility |
|------------------------|------------------|
| Community Intervention | 11331495730      |
| Facility Intervention  | 11276901409      |
| FICI                   | 11340830310      |

|                                                 | EIB       | CEAC    | ICER    |
|-------------------------------------------------|-----------|---------|---------|
| Facility Intervention vs Community Intervention | -54594321 | 0.05401 | -3.4934 |
| Facility Intervention vs FICI                   | -63928901 | 0.06219 | 60.2222 |

Optimal intervention (max expected utility) for k=780: FICI

EVPI 11708726  
quartz  
2

Cost-effectiveness analysis summary

Reference intervention: FICI  
Comparator intervention(s): Community Intervention  
: Facility Intervention

Optimal decision: choose Community Intervention for k<295 and FICI for k>=295

Analysis for willingness to pay parameter k = 780

|                        | Expected utility |
|------------------------|------------------|
| Community Intervention | 11331495730      |
| Facility Intervention  | 11276901409      |
| FICI                   | 11340830310      |

|                                | EIB      | CEAC    | ICER    |
|--------------------------------|----------|---------|---------|
| FICI vs Community Intervention | 9334580  | 0.60174 | 292.221 |
| FICI vs Facility Intervention  | 63928901 | 0.93781 | 60.222  |

Optimal intervention (max expected utility) for k=780: FICI

EVPI 11708726

# MaiKhanda\_LLE\_log\_.txt output from MaiKhanda\_final local life expectancy.R 3rd Dec 2014 12:22

The downloaded binary packages are in  
/var/folders/ps/63xh8zd90wbdc12v8l10\_npc0000gq/T/RtmpBaqeiP/downloaded\_packages

The downloaded binary packages are in  
/var/folders/ps/63xh8zd90wbdc12v8l10\_npc0000gq/T/RtmpBaqeiP/downloaded\_packages

Compiling model graph  
Resolving undeclared variables  
Allocating nodes  
Graph Size: 702

Initializing model

Inference for Bugs model at "/Users/timothycolbourn/Documents/Papers/MaiKhanda CEA paper/JAGS revised/MKmodel\_final\_LLE.txt", fit using jags,  
2 chains, each with 510000 iterations (first 10000 discarded), n.thin = 10  
n.sims = 100000 iterations saved

|          | mu.vect    | sd.vect   | 2.5%       | 50%        | 97.5%      | Rhat  | n.eff  |
|----------|------------|-----------|------------|------------|------------|-------|--------|
| bs_c     | 102352.341 | 331.911   | 101674.022 | 102362.440 | 102972.802 | 1.001 | 25000  |
| bs_f     | 101621.975 | 366.363   | 100878.279 | 101631.773 | 102306.900 | 1.001 | 88000  |
| bs_nc    | 101580.265 | 77.680    | 101427.000 | 101580.000 | 101733.000 | 1.001 | 49000  |
| bs_nf    | 101330.257 | 79.035    | 101175.000 | 101331.000 | 101485.000 | 1.001 | 100000 |
| d_c      | 35285.654  | 15001.749 | 4752.910   | 35746.440  | 63440.101  | 1.001 | 4700   |
| d_f      | 10212.566  | 16795.611 | -24133.017 | 10662.580  | 41678.647  | 1.001 | 48000  |
| db_c     | 34743.418  | 14632.151 | 4874.324   | 35195.247  | 62263.601  | 1.001 | 18000  |
| db_f     | 13127.297  | 16129.191 | -19746.894 | 13522.160  | 43374.305  | 1.001 | 89000  |
| dm_c     | 542.237    | 3363.687  | -7339.775  | 1007.084   | 5761.899   | 1.003 | 940    |
| dm_f     | -2914.732  | 4580.281  | -13964.244 | -2189.957  | 3956.138   | 1.003 | 1200   |
| lb_c     | 772.076    | 325.159   | 108.318    | 782.117    | 1383.636   | 1.001 | 18000  |
| lb_f     | 291.718    | 358.426   | -438.820   | 300.492    | 963.873    | 1.001 | 89000  |
| lm_c     | 19.297     | 119.704   | -261.202   | 35.839     | 205.050    | 1.003 | 940    |
| lm_f     | -103.727   | 162.999   | -496.948   | -77.934    | 140.788    | 1.003 | 1200   |
| ms_c     | 107606.522 | 121.252   | 107322.105 | 107623.268 | 107794.310 | 1.003 | 980    |
| ms_f     | 107470.139 | 164.833   | 107072.305 | 107496.211 | 107716.739 | 1.003 | 1200   |
| ms_nc    | 107587.225 | 20.248    | 107547.000 | 107587.000 | 107627.000 | 1.001 | 100000 |
| ms_nf    | 107573.866 | 20.582    | 107533.000 | 107574.000 | 107614.000 | 1.001 | 51000  |
| orb_c    | 0.873      | 0.053     | 0.774      | 0.871      | 0.982      | 1.001 | 18000  |
| orb_f    | 0.954      | 0.057     | 0.847      | 0.952      | 1.071      | 1.001 | 94000  |
| orm_c    | 0.953      | 0.291     | 0.504      | 0.913      | 1.636      | 1.003 | 950    |
| orm_f    | 1.245      | 0.385     | 0.669      | 1.184      | 2.178      | 1.002 | 1500   |
| deviance | 509.134    | 103.082   | 500.590    | 507.722    | 520.363    | 1.001 | 65000  |

For each parameter, n.eff is a crude measure of effective sample size,  
and Rhat is the potential scale reduction factor (at convergence, Rhat=1).

DIC info (using the rule,  $pD = \text{var}(\text{deviance})/2$ )  
 $pD = 5313.0$  and  $DIC = 5822.1$   
DIC is an estimate of expected predictive error (lower deviance is better).  
[[1]]

Quantile (q) = 0.025  
Accuracy (r) = +/- 0.005  
Probability (s) = 0.95

|          | Burn-in (M) | Total (N) | Lower bound (Nmin) | Dependence factor (I) |
|----------|-------------|-----------|--------------------|-----------------------|
| bs_c     | 60          | 90360     | 3746               | 24.1                  |
| bs_f     | 80          | 95060     | 3746               | 25.4                  |
| bs_nc    | 20          | 37790     | 3746               | 10.1                  |
| bs_nf    | 20          | 38550     | 3746               | 10.3                  |
| d_c      | 90          | 130140    | 3746               | 34.7                  |
| d_f      | 80          | 98720     | 3746               | 26.4                  |
| db_c     | 60          | 91540     | 3746               | 24.4                  |
| db_f     | 80          | 97460     | 3746               | 26.0                  |
| deviance | 180         | 282120    | 3746               | 75.3                  |
| dm_c     | 1100        | 1105390   | 3746               | 295.0                 |
| dm_f     | 1200        | 1298040   | 3746               | 347.0                 |
| lb_c     | 60          | 91540     | 3746               | 24.4                  |
| lb_f     | 80          | 97460     | 3746               | 26.0                  |
| lm_c     | 1100        | 1105390   | 3746               | 295.0                 |
| lm_f     | 1200        | 1298040   | 3746               | 347.0                 |
| ms_c     | 1200        | 1396560   | 3746               | 373.0                 |
| ms_f     | 1080        | 1221840   | 3746               | 326.0                 |
| ms_nc    | 20          | 41140     | 3746               | 11.0                  |
| ms_nf    | 20          | 37820     | 3746               | 10.1                  |
| orb_c    | 60          | 91300     | 3746               | 24.4                  |
| orb_f    | 60          | 87880     | 3746               | 23.5                  |
| orm_c    | 1210        | 1363340   | 3746               | 364.0                 |
| orm_f    | 880         | 1016730   | 3746               | 271.0                 |

[[2]]

Quantile (q) = 0.025  
 Accuracy (r) = +/- 0.005  
 Probability (s) = 0.95

|          | Burn-in<br>(M) | Total<br>(N) | Lower bound<br>(Nmin) | Dependence<br>factor (I) |
|----------|----------------|--------------|-----------------------|--------------------------|
| bs_c     | 60             | 86760        | 3746                  | 23.2                     |
| bs_f     | 80             | 93280        | 3746                  | 24.9                     |
| bs_nc    | 10             | 37930        | 3746                  | 10.1                     |
| bs_nf    | 10             | 38120        | 3746                  | 10.2                     |
| d_c      | 80             | 90520        | 3746                  | 24.2                     |
| d_f      | 80             | 98180        | 3746                  | 26.2                     |
| db_c     | 60             | 88860        | 3746                  | 23.7                     |
| db_f     | 80             | 94400        | 3746                  | 25.2                     |
| deviance | 240            | 296100       | 3746                  | 79.0                     |
| dm_c     | 1120           | 1194200      | 3746                  | 319.0                    |
| dm_f     | 990            | 1028520      | 3746                  | 275.0                    |
| lb_c     | 60             | 88860        | 3746                  | 23.7                     |
| lb_f     | 80             | 94400        | 3746                  | 25.2                     |
| lm_c     | 1120           | 1194200      | 3746                  | 319.0                    |
| lm_f     | 990            | 1028520      | 3746                  | 275.0                    |
| ms_c     | 910            | 959530       | 3746                  | 256.0                    |
| ms_f     | 990            | 1084680      | 3746                  | 290.0                    |
| ms_nc    | 20             | 40290        | 3746                  | 10.8                     |
| ms_nf    | 20             | 40510        | 3746                  | 10.8                     |
| orb_c    | 60             | 84420        | 3746                  | 22.5                     |
| orb_f    | 60             | 89700        | 3746                  | 23.9                     |
| orm_c    | 1080           | 1168320      | 3746                  | 312.0                    |
| orm_f    | 1040           | 1110850      | 3746                  | 297.0                    |

Iterations = 10001:509991  
 Thinning interval = 10  
 Number of chains = 2  
 Sample size per chain = 50000

1. Empirical mean and standard deviation for each variable,  
 plus standard error of the mean:

|          | Mean       | SD        | Naive SE  | Time-series SE |
|----------|------------|-----------|-----------|----------------|
| bs_c     | 1.024e+05  | 3.319e+02 | 1.050e+00 | 2.090e+00      |
| bs_f     | 1.016e+05  | 3.664e+02 | 1.159e+00 | 2.295e+00      |
| bs_nc    | 1.016e+05  | 7.768e+01 | 2.456e-01 | 2.465e-01      |
| bs_nf    | 1.013e+05  | 7.904e+01 | 2.499e-01 | 2.489e-01      |
| d_c      | 3.529e+04  | 1.500e+04 | 4.744e+01 | 1.209e+02      |
| d_f      | 1.021e+04  | 1.680e+04 | 5.311e+01 | 1.562e+02      |
| db_c     | 3.474e+04  | 1.463e+04 | 4.627e+01 | 9.357e+01      |
| db_f     | 1.313e+04  | 1.613e+04 | 5.100e+01 | 1.029e+02      |
| deviance | 5.091e+02  | 1.031e+02 | 3.260e-01 | 4.700e-01      |
| dm_c     | 5.422e+02  | 3.364e+03 | 1.064e+01 | 1.053e+02      |
| dm_f     | -2.915e+03 | 4.580e+03 | 1.448e+01 | 1.446e+02      |
| lb_c     | 7.721e+02  | 3.252e+02 | 1.028e+00 | 2.079e+00      |
| lb_f     | 2.917e+02  | 3.584e+02 | 1.133e+00 | 2.287e+00      |
| lm_c     | 1.930e+01  | 1.197e+02 | 3.785e-01 | 3.748e+00      |
| lm_f     | -1.037e+02 | 1.630e+02 | 5.154e-01 | 5.144e+00      |
| ms_c     | 1.076e+05  | 1.213e+02 | 3.834e-01 | 3.685e+00      |
| ms_f     | 1.075e+05  | 1.648e+02 | 5.212e-01 | 5.148e+00      |
| ms_nc    | 1.076e+05  | 2.025e+01 | 6.403e-02 | 6.380e-02      |
| ms_nf    | 1.076e+05  | 2.058e+01 | 6.509e-02 | 6.509e-02      |
| orb_c    | 8.733e-01  | 5.304e-02 | 1.677e-04 | 3.394e-04      |
| orb_f    | 9.537e-01  | 5.698e-02 | 1.802e-04 | 3.637e-04      |
| orm_c    | 9.534e-01  | 2.911e-01 | 9.204e-04 | 8.926e-03      |
| orm_f    | 1.245e+00  | 3.848e-01 | 1.217e-03 | 1.210e-02      |

2. Quantiles for each variable:

|          | 2.5%       | 25%        | 50%        | 75%       | 97.5%     |
|----------|------------|------------|------------|-----------|-----------|
| bs_c     | 1.017e+05  | 1.021e+05  | 1.024e+05  | 1.026e+05 | 1.030e+05 |
| bs_f     | 1.009e+05  | 1.014e+05  | 1.016e+05  | 1.019e+05 | 1.023e+05 |
| bs_nc    | 1.014e+05  | 1.015e+05  | 1.016e+05  | 1.016e+05 | 1.017e+05 |
| bs_nf    | 1.012e+05  | 1.013e+05  | 1.013e+05  | 1.014e+05 | 1.015e+05 |
| d_c      | 4.753e+03  | 2.538e+04  | 3.575e+04  | 4.559e+04 | 6.344e+04 |
| d_f      | -2.413e+04 | -8.719e+02 | 1.066e+04  | 2.181e+04 | 4.168e+04 |
| db_c     | 4.874e+03  | 2.510e+04  | 3.520e+04  | 4.477e+04 | 6.226e+04 |
| db_f     | -1.975e+04 | 2.563e+03  | 1.352e+04  | 2.422e+04 | 4.337e+04 |
| deviance | 5.006e+02  | 5.048e+02  | 5.077e+02  | 5.114e+02 | 5.204e+02 |
| dm_c     | -7.340e+03 | -1.341e+03 | 1.007e+03  | 2.936e+03 | 5.762e+03 |
| dm_f     | -1.396e+04 | -5.364e+03 | -2.190e+03 | 3.369e+02 | 3.956e+03 |
| lb_c     | 1.083e+02  | 5.577e+02  | 7.821e+02  | 9.949e+02 | 1.384e+03 |
| lb_f     | -4.388e+02 | 5.696e+01  | 3.005e+02  | 5.382e+02 | 9.639e+02 |
| lm_c     | -2.612e+02 | -4.772e+01 | 3.584e+01  | 1.045e+02 | 2.050e+02 |
| lm_f     | -4.969e+02 | -1.909e+02 | -7.793e+01 | 1.199e+01 | 1.408e+02 |

```

ms_c      1.073e+05  1.075e+05  1.076e+05  1.077e+05  1.078e+05
ms_f      1.071e+05  1.074e+05  1.075e+05  1.076e+05  1.077e+05
ms_nc     1.075e+05  1.076e+05  1.076e+05  1.076e+05  1.076e+05
ms_nf     1.075e+05  1.076e+05  1.076e+05  1.076e+05  1.076e+05
orb_c     7.742e-01  8.368e-01  8.714e-01  9.081e-01  9.821e-01
orb_f     8.474e-01  9.144e-01  9.521e-01  9.909e-01  1.071e+00
orm_c     5.040e-01  7.454e-01  9.128e-01  1.116e+00  1.636e+00
orm_f     6.688e-01  9.717e-01  1.184e+00  1.452e+00  2.178e+00

```

```
quartz
  2
```

Cost-effectiveness analysis summary

Reference intervention: Community Intervention  
 Comparator intervention: do nothing

Optimal decision: choose do nothing for k<155 and Community Intervention for k>=155

Analysis for willingness to pay parameter k = 780

```

                Expected utility
do nothing      5923564111
Community Intervention  5945738130

```

```

                EIB    CEAC    ICER
Community Intervention vs do nothing 22174019 0.96623 151.59

```

Optimal intervention (max expected utility) for k=780: Community Intervention

```
EVPI 170677
quartz
  2
```

Cost-effectiveness analysis summary

Reference intervention: Facility Intervention  
 Comparator intervention: do nothing

Optimal decision: choose do nothing for k<550 and Facility Intervention for k>=550

Analysis for willingness to pay parameter k = 780

```

                Expected utility
do nothing      5914496043
Facility Intervention  5916869632

```

```

                EIB    CEAC    ICER
Facility Intervention vs do nothing 2373589 0.58166 547.58

```

Optimal intervention (max expected utility) for k=780: Facility Intervention

```
EVPI 4144723
quartz
  2
```

Cost-effectiveness analysis summary

Reference intervention: Community Intervention  
 Comparator intervention: Facility Intervention

Community Intervention dominates for all k in [0 - 2500]

Analysis for willingness to pay parameter k = 780

```

                Expected utility
Community Intervention  5945738130
Facility Intervention  5916869632

```

```

                EIB    CEAC    ICER
Community Intervention vs Facility Intervention 28868498 0.94837 -6.6329

```

Optimal intervention (max expected utility) for k=780: Community Intervention

```
EVPI 383986
```

```

Compiling model graph
  Resolving undeclared variables
  Allocating nodes
  Graph Size: 357

```

```
Initializing model
```

Inference for Bugs model at "/Users/timothycolbourn/Documents/Papers/MaiKhanda CEA paper/JAGS revised/MKmodelFC\_final\_LLE.txt", fit using jags,  
 2 chains, each with 510000 iterations (first 10000 discarded), n.thin = 10  
 n.sims = 100000 iterations saved

|          | mu.vect   | sd.vect   | 2.5%       | 50%       | 97.5%     | Rhat  | n.eff  |
|----------|-----------|-----------|------------|-----------|-----------|-------|--------|
| bs_con   | 50862.710 | 54.501    | 50756.000  | 50863.000 | 50969.000 | 1.001 | 100000 |
| bs_fc    | 51338.166 | 224.031   | 50873.106  | 51346.741 | 51748.058 | 1.001 | 100000 |
| d_fc     | 19738.609 | 10538.349 | -2049.754  | 20219.078 | 38975.523 | 1.001 | 41000  |
| d_fc_    | 39477.217 | 21076.698 | -4099.509  | 40438.156 | 77951.046 | 1.001 | 41000  |
| db_fc    | 21395.535 | 9873.907  | 982.407    | 21794.699 | 39603.014 | 1.001 | 100000 |
| db_fc_   | 42791.069 | 19747.813 | 1964.815   | 43589.398 | 79206.028 | 1.001 | 100000 |
| dm_fc    | -1656.926 | 3648.879  | -10858.291 | -914.776  | 3185.935  | 1.004 | 2500   |
| dm_fc_   | -3313.852 | 7297.758  | -21716.583 | -1829.552 | 6371.871  | 1.004 | 2500   |
| lb_fc    | 475.456   | 219.420   | 21.831     | 484.327   | 880.067   | 1.001 | 100000 |
| lb_fc_   | 950.913   | 438.840   | 43.663     | 968.653   | 1760.134  | 1.001 | 100000 |
| lm_fc    | -58.965   | 129.853   | -386.416   | -32.554   | 113.378   | 1.004 | 2500   |
| lm_fc_   | -117.931  | 259.707   | -772.832   | -65.109   | 226.757   | 1.004 | 2500   |
| ms_con   | 53782.154 | 14.741    | 53753.000  | 53782.000 | 53810.000 | 1.001 | 63000  |
| ms_fc    | 53723.189 | 131.158   | 53391.857  | 53749.976 | 53896.268 | 1.003 | 2600   |
| orb_fc   | 0.841     | 0.073     | 0.708      | 0.838     | 0.993     | 1.001 | 100000 |
| orm_fc   | 1.273     | 0.600     | 0.482      | 1.150     | 2.794     | 1.001 | 7000   |
| deviance | 258.836   | 118.929   | 251.181    | 257.482   | 269.122   | 1.001 | 5700   |

For each parameter, n.eff is a crude measure of effective sample size, and Rhat is the potential scale reduction factor (at convergence, Rhat=1).

DIC info (using the rule,  $pD = \text{var}(\text{deviance})/2$ )  
 $pD = 7072.1$  and  $DIC = 7330.9$   
 DIC is an estimate of expected predictive error (lower deviance is better).  
 [[1]]

Quantile (q) = 0.025  
 Accuracy (r) = +/- 0.005  
 Probability (s) = 0.95

|          | Burn-in (M) | Total (N) | Lower bound (Nmin) | Dependence factor (I) |
|----------|-------------|-----------|--------------------|-----------------------|
| bs_con   | 20          | 38400     | 3746               | 10.3                  |
| bs_fc    | 60          | 89460     | 3746               | 23.9                  |
| d_fc     | 120         | 187840    | 3746               | 50.1                  |
| d_fc_    | 120         | 187840    | 3746               | 50.1                  |
| db_fc    | 80          | 90000     | 3746               | 24.0                  |
| db_fc_   | 80          | 90000     | 3746               | 24.0                  |
| deviance | 180         | 242460    | 3746               | 64.7                  |
| dm_fc    | 990         | 1044340   | 3746               | 279.0                 |
| dm_fc_   | 990         | 1044340   | 3746               | 279.0                 |
| lb_fc    | 80          | 90000     | 3746               | 24.0                  |
| lb_fc_   | 80          | 90000     | 3746               | 24.0                  |
| lm_fc    | 990         | 1044340   | 3746               | 279.0                 |
| lm_fc_   | 990         | 1044340   | 3746               | 279.0                 |
| ms_con   | 20          | 41690     | 3746               | 11.1                  |
| ms_fc    | 990         | 1024760   | 3746               | 274.0                 |
| orb_fc   | 60          | 87540     | 3746               | 23.4                  |
| orm_fc   | 1080        | 1238220   | 3746               | 331.0                 |

[[2]]

Quantile (q) = 0.025  
 Accuracy (r) = +/- 0.005  
 Probability (s) = 0.95

|          | Burn-in (M) | Total (N) | Lower bound (Nmin) | Dependence factor (I) |
|----------|-------------|-----------|--------------------|-----------------------|
| bs_con   | 20          | 37610     | 3746               | 10.0                  |
| bs_fc    | 60          | 86400     | 3746               | 23.1                  |
| d_fc     | 120         | 139470    | 3746               | 37.2                  |
| d_fc_    | 120         | 139470    | 3746               | 37.2                  |
| db_fc    | 60          | 87580     | 3746               | 23.4                  |
| db_fc_   | 60          | 87580     | 3746               | 23.4                  |
| deviance | 160         | 195520    | 3746               | 52.2                  |
| dm_fc    | 1200        | 1289520   | 3746               | 344.0                 |
| dm_fc_   | 1200        | 1289520   | 3746               | 344.0                 |
| lb_fc    | 60          | 87580     | 3746               | 23.4                  |
| lb_fc_   | 60          | 87580     | 3746               | 23.4                  |
| lm_fc    | 1200        | 1289520   | 3746               | 344.0                 |
| lm_fc_   | 1200        | 1289520   | 3746               | 344.0                 |
| ms_con   | 20          | 42020     | 3746               | 11.2                  |
| ms_fc    | 1300        | 1450930   | 3746               | 387.0                 |
| orb_fc   | 80          | 93480     | 3746               | 25.0                  |
| orm_fc   | 990         | 1044340   | 3746               | 279.0                 |

Iterations = 10001:509991  
 Thinning interval = 10  
 Number of chains = 2  
 Sample size per chain = 50000

1. Empirical mean and standard deviation for each variable,  
 plus standard error of the mean:

|          | Mean       | SD         | Naive SE   | Time-series SE |
|----------|------------|------------|------------|----------------|
| bs_con   | 50862.7095 | 54.5009    | 0.1723471  | 0.1707505      |
| bs_fc    | 51338.1658 | 224.0307   | 0.7084472  | 1.4103686      |
| d_fc     | 19738.6087 | 10538.3488 | 33.3251851 | 122.0902297    |
| d_fc_    | 39477.2174 | 21076.6977 | 66.6503703 | 244.1804594    |
| db_fc    | 21395.5346 | 9873.9067  | 31.2240347 | 63.2247828     |
| db_fc_   | 42791.0692 | 19747.8135 | 62.4480693 | 126.4495656    |
| deviance | 258.8364   | 118.9290   | 0.3760866  | 0.4633666      |
| dm_fc    | -1656.9259 | 3648.8792  | 11.5387691 | 120.3292760    |
| dm_fc_   | -3313.8517 | 7297.7584  | 23.0775382 | 240.6585520    |
| lb_fc    | 475.4563   | 219.4201   | 0.6938674  | 1.4049952      |
| lb_fc_   | 950.9126   | 438.8403   | 1.3877349  | 2.8099903      |
| lm_fc    | -58.9653   | 129.8534   | 0.4106324  | 4.2821806      |
| lm_fc_   | -117.9307  | 259.7067   | 0.8212647  | 8.5643613      |
| ms_con   | 53782.1539 | 14.7411    | 0.0466154  | 0.0467904      |
| ms_fc    | 53723.1886 | 131.1580   | 0.4147580  | 4.2651317      |
| orb_fc   | 0.8409     | 0.0729     | 0.0002305  | 0.0004673      |
| orm_fc   | 1.2734     | 0.6000     | 0.0018974  | 0.0196008      |

2. Quantiles for each variable:

|          | 2.5%        | 25%        | 50%        | 75%       | 97.5%      |
|----------|-------------|------------|------------|-----------|------------|
| bs_con   | 50756.0000  | 50826.0000 | 50863.0000 | 50899.000 | 50969.0000 |
| bs_fc    | 50873.1057  | 51192.8322 | 51346.7408 | 51494.565 | 51748.0582 |
| d_fc     | -2049.7544  | 12937.2223 | 20219.0779 | 27065.169 | 38975.5228 |
| d_fc_    | -4099.5089  | 25874.4447 | 40438.1558 | 54130.338 | 77951.0456 |
| db_fc    | 982.4074    | 14980.6830 | 21794.6989 | 28283.757 | 39603.0142 |
| db_fc_   | 1964.8149   | 29961.3660 | 43589.3978 | 56567.513 | 79206.0285 |
| deviance | 251.1813    | 254.7882   | 257.4819   | 260.805   | 269.1220   |
| dm_fc    | -10858.2915 | -3355.3934 | -914.7762  | 876.682   | 3185.9354  |
| dm_fc_   | -21716.5830 | -6710.7868 | -1829.5525 | 1753.365  | 6371.8707  |
| lb_fc    | 21.8313     | 332.9041   | 484.3266   | 628.528   | 880.0670   |
| lb_fc_   | 43.6626     | 665.8081   | 968.6533   | 1257.056  | 1760.1340  |
| lm_fc    | -386.4161   | -119.4090  | -32.5543   | 31.199    | 113.3785   |
| lm_fc_   | -772.8321   | -238.8180  | -65.1086   | 62.397    | 226.7570   |
| ms_con   | 53753.0000  | 53772.0000 | 53782.0000 | 53792.000 | 53810.0000 |
| ms_fc    | 53391.8568  | 53661.7696 | 53749.9756 | 53814.902 | 53896.2684 |
| orb_fc   | 0.7078      | 0.7900     | 0.8375     | 0.888     | 0.9925     |
| orm_fc   | 0.4817      | 0.8554     | 1.1499     | 1.553     | 2.7940     |

quartz  
2

Cost-effectiveness analysis summary

Reference intervention: Facility & Community Interventions  
 Comparator intervention: do nothing

Optimal decision: choose do nothing for k<280 and Facility & Community Interventions for k>=280

Analysis for willingness to pay parameter k = 780

|                                    | Expected utility |
|------------------------------------|------------------|
| do nothing                         | 2964078353       |
| Facility & Community Interventions | 2974003967       |

|                                                  | EIB     | CEAC    | ICER   |
|--------------------------------------------------|---------|---------|--------|
| Facility & Community Interventions vs do nothing | 9925614 | 0.88326 | 277.15 |

Optimal intervention (max expected utility) for k=780: Facility & Community Interventions

EVPI 534291  
quartz  
2

Cost-effectiveness analysis summary

Reference intervention: Community Intervention  
 Comparator intervention(s): Facility Intervention  
 : FICI

Optimal decision: choose Community Intervention for k<555 and FICI for k>=555



Analysis for willingness to pay parameter k = 780

|                        | Expected utility |
|------------------------|------------------|
| Community Intervention | 5945738130       |
| Facility Intervention  | 5916869632       |
| FICI                   | 5948007934       |

|                                                 | EIB      | CEAC    | ICER     |
|-------------------------------------------------|----------|---------|----------|
| Community Intervention vs Facility Intervention | 28868498 | 0.94837 | -6.6329  |
| Community Intervention vs FICI                  | -2269803 | 0.44973 | 554.8100 |

Optimal intervention (max expected utility) for k=780: FICI

EVPI 7212170  
quartz  
2

Cost-effectiveness analysis summary

Reference intervention: Facility Intervention  
Comparator intervention(s): Community Intervention  
: FICI

Optimal decision: choose Community Intervention for k<555 and FICI for k>=555

Analysis for willingness to pay parameter k = 780

|                        | Expected utility |
|------------------------|------------------|
| Community Intervention | 5945738130       |
| Facility Intervention  | 5916869632       |
| FICI                   | 5948007934       |

|                                                 | EIB       | CEAC    | ICER     |
|-------------------------------------------------|-----------|---------|----------|
| Facility Intervention vs Community Intervention | -28868498 | 0.05163 | -6.6329  |
| Facility Intervention vs FICI                   | -31138302 | 0.07416 | 114.3433 |

Optimal intervention (max expected utility) for k=780: FICI

EVPI 7212170  
quartz  
2

Cost-effectiveness analysis summary

Reference intervention: FICI  
Comparator intervention(s): Community Intervention  
: Facility Intervention

Optimal decision: choose Community Intervention for k<555 and FICI for k>=555

Analysis for willingness to pay parameter k = 780

|                        | Expected utility |
|------------------------|------------------|
| Community Intervention | 5945738130       |
| Facility Intervention  | 5916869632       |
| FICI                   | 5948007934       |

|                                | EIB      | CEAC    | ICER   |
|--------------------------------|----------|---------|--------|
| FICI vs Community Intervention | 2269803  | 0.55027 | 554.81 |
| FICI vs Facility Intervention  | 31138302 | 0.92584 | 114.34 |

Optimal intervention (max expected utility) for k=780: FICI

EVPI 7212170

Initializing model

Inference for Bugs model at "/Users/timothycolbourn/Documents/Papers/MaiKhanda CEA paper/JAGS revised/MKmodel\_final.txt", fit using jags,

2 chains, each with 21000 iterations (first 1000 discarded), n.thin = 2  
n.sims = 20000 iterations saved

|          | mu.vect    | sd.vect   | 2.5%       | 50%        | 97.5%      | Rhat  | n.eff |
|----------|------------|-----------|------------|------------|------------|-------|-------|
| bs_c     | 102352.659 | 343.406   | 101661.403 | 102364.806 | 102974.464 | 1.002 | 1600  |
| bs_f     | 101642.576 | 364.048   | 100913.382 | 101652.590 | 102322.593 | 1.001 | 20000 |
| bs_nc    | 101580.385 | 77.117    | 101429.000 | 101581.000 | 101730.000 | 1.001 | 20000 |
| bs_nf    | 101329.767 | 78.958    | 101174.000 | 101330.000 | 101485.000 | 1.001 | 20000 |
| d_c      | 67298.347  | 29427.529 | 8538.188   | 68147.311  | 121191.979 | 1.014 | 120   |
| d_f      | 20716.243  | 31641.196 | -42734.637 | 21267.961  | 79527.764  | 1.001 | 20000 |
| db_c     | 66415.528  | 28949.779 | 7855.385   | 67343.667  | 119294.148 | 1.002 | 1500  |
| db_f     | 26901.607  | 30614.663 | -34747.922 | 27731.431  | 84027.008  | 1.001 | 20000 |
| dm_c     | 882.819    | 6334.383  | -12815.524 | 2235.752   | 11123.963  | 1.206 | 12    |
| dm_f     | -6185.364  | 9067.853  | -26875.173 | -5220.987  | 9104.277   | 1.001 | 3400  |
| lb_c     | 772.274    | 336.625   | 91.342     | 783.066    | 1387.141   | 1.002 | 1500  |
| lb_f     | 312.809    | 355.984   | -404.046   | 322.459    | 977.058    | 1.001 | 20000 |
| lm_c     | 16.573     | 118.911   | -240.577   | 41.970     | 208.822    | 1.206 | 12    |
| lm_f     | -116.113   | 170.224   | -504.509   | -98.010    | 170.908    | 1.001 | 3400  |
| ms_c     | 107603.759 | 120.510   | 107340.560 | 107628.444 | 107796.684 | 1.200 | 12    |
| ms_f     | 107457.681 | 172.146   | 107063.392 | 107477.079 | 107744.663 | 1.001 | 3800  |
| ms_nc    | 107587.186 | 20.354    | 107547.000 | 107587.000 | 107626.000 | 1.001 | 20000 |
| ms_nf    | 107573.795 | 20.677    | 107532.000 | 107574.000 | 107614.000 | 1.001 | 20000 |
| orb_c    | 0.873      | 0.055     | 0.773      | 0.871      | 0.985      | 1.002 | 1500  |
| orb_f    | 0.950      | 0.057     | 0.845      | 0.949      | 1.065      | 1.001 | 20000 |
| orm_c    | 0.960      | 0.289     | 0.491      | 0.897      | 1.588      | 1.191 | 12    |
| orm_f    | 1.274      | 0.401     | 0.596      | 1.231      | 2.195      | 1.006 | 1500  |
| deviance | 520.565    | 358.490   | 500.567    | 508.428    | 527.019    | 1.001 | 3800  |

For each parameter, n.eff is a crude measure of effective sample size, and Rhat is the potential scale reduction factor (at convergence, Rhat=1).

DIC info (using the rule,  $pD = \text{var}(\text{deviance})/2$ )

$pD = 64259.6$  and  $DIC = 64780.1$

DIC is an estimate of expected predictive error (lower deviance is better).

[[1]]

Quantile (q) = 0.025  
Accuracy (r) = +/- 0.005  
Probability (s) = 0.95

|          | Burn-in (M) | Total (N) | Lower bound (Nmin) | Dependence factor (I) |
|----------|-------------|-----------|--------------------|-----------------------|
| bs_c     | 48          | 45760     | 3746               | 12.20                 |
| bs_f     | 40          | 43320     | 3746               | 11.60                 |
| bs_nc    | 4           | 7508      | 3746               | 2.00                  |
| bs_nf    | 4           | 7622      | 3746               | 2.03                  |
| d_c      | 48          | 47814     | 3746               | 12.80                 |
| d_f      | 40          | 47800     | 3746               | 12.80                 |
| db_c     | 44          | 43108     | 3746               | 11.50                 |
| db_f     | 36          | 38520     | 3746               | 10.30                 |
| deviance | 40          | 50768     | 3746               | 13.60                 |
| dm_c     | 216         | 248166    | 3746               | 66.20                 |
| dm_f     | 224         | 249584    | 3746               | 66.60                 |
| lb_c     | 44          | 43108     | 3746               | 11.50                 |
| lb_f     | 36          | 38520     | 3746               | 10.30                 |
| lm_c     | 216         | 248166    | 3746               | 66.20                 |
| lm_f     | 224         | 249584    | 3746               | 66.60                 |
| ms_c     | 216         | 241380    | 3746               | 64.40                 |
| ms_f     | 176         | 180528    | 3746               | 48.20                 |
| ms_nc    | 4           | 8052      | 3746               | 2.15                  |
| ms_nf    | 4           | 7890      | 3746               | 2.11                  |
| orb_c    | 50          | 53240     | 3746               | 14.20                 |
| orb_f    | 54          | 65454     | 3746               | 17.50                 |
| orm_c    | 272         | 271540    | 3746               | 72.50                 |
| orm_f    | 328         | 374936    | 3746               | 100.00                |

[[2]]

Quantile (q) = 0.025  
Accuracy (r) = +/- 0.005  
Probability (s) = 0.95

|       | Burn-in (M) | Total (N) | Lower bound (Nmin) | Dependence factor (I) |
|-------|-------------|-----------|--------------------|-----------------------|
| bs_c  | 42          | 52080     | 3746               | 13.90                 |
| bs_f  | 42          | 43542     | 3746               | 11.60                 |
| bs_nc | 4           | 7886      | 3746               | 2.11                  |
| bs_nf | 4           | 7950      | 3746               | 2.12                  |

|          |     |        |      |        |
|----------|-----|--------|------|--------|
| d_c      | 42  | 43602  | 3746 | 11.60  |
| d_f      | 36  | 37626  | 3746 | 10.00  |
| db_c     | 48  | 49218  | 3746 | 13.10  |
| db_f     | 36  | 41876  | 3746 | 11.20  |
| deviance | 48  | 61096  | 3746 | 16.30  |
| dm_c     | 300 | 369552 | 3746 | 98.70  |
| dm_f     | 228 | 225672 | 3746 | 60.20  |
| lb_c     | 48  | 49218  | 3746 | 13.10  |
| lb_f     | 36  | 41876  | 3746 | 11.20  |
| lm_c     | 300 | 369552 | 3746 | 98.70  |
| lm_f     | 228 | 225672 | 3746 | 60.20  |
| ms_c     | 140 | 145390 | 3746 | 38.80  |
| ms_f     | 408 | 380136 | 3746 | 101.00 |
| ms_nc    | 4   | 8248   | 3746 | 2.20   |
| ms_nf    | 4   | 8124   | 3746 | 2.17   |
| orb_c    | 42  | 49164  | 3746 | 13.10  |
| orb_f    | 42  | 40614  | 3746 | 10.80  |
| orm_c    | 402 | 430980 | 3746 | 115.00 |
| orm_f    | 160 | 167400 | 3746 | 44.70  |

Iterations = 1001:20999  
Thinning interval = 2  
Number of chains = 2  
Sample size per chain = 10000

1. Empirical mean and standard deviation for each variable,  
plus standard error of the mean:

|          | Mean       | SD        | Naive SE  | Time-series SE |
|----------|------------|-----------|-----------|----------------|
| bs_c     | 1.024e+05  | 3.434e+02 | 2.428e+00 | 1.037e+01      |
| bs_f     | 1.016e+05  | 3.640e+02 | 2.574e+00 | 1.114e+01      |
| bs_nc    | 1.016e+05  | 7.712e+01 | 5.453e-01 | 5.327e-01      |
| bs_nf    | 1.013e+05  | 7.896e+01 | 5.583e-01 | 5.583e-01      |
| d_c      | 6.730e+04  | 2.943e+04 | 2.081e+02 | 9.264e+02      |
| d_f      | 2.072e+04  | 3.164e+04 | 2.237e+02 | 1.022e+03      |
| db_c     | 6.642e+04  | 2.895e+04 | 2.047e+02 | 8.986e+02      |
| db_f     | 2.690e+04  | 3.061e+04 | 2.165e+02 | 9.489e+02      |
| deviance | 5.206e+02  | 3.585e+02 | 2.535e+00 | 6.547e+00      |
| dm_c     | 8.828e+02  | 6.334e+03 | 4.479e+01 | 8.641e+02      |
| dm_f     | -6.185e+03 | 9.068e+03 | 6.412e+01 | 1.400e+03      |
| lb_c     | 7.723e+02  | 3.366e+02 | 2.380e+00 | 1.045e+01      |
| lb_f     | 3.128e+02  | 3.560e+02 | 2.517e+00 | 1.103e+01      |
| lm_c     | 1.657e+01  | 1.189e+02 | 8.408e-01 | 1.622e+01      |
| lm_f     | -1.161e+02 | 1.702e+02 | 1.204e+00 | 2.628e+01      |
| ms_c     | 1.076e+05  | 1.205e+02 | 8.521e-01 | 1.630e+01      |
| ms_f     | 1.075e+05  | 1.721e+02 | 1.217e+00 | 2.543e+01      |
| ms_nc    | 1.076e+05  | 2.035e+01 | 1.439e-01 | 1.439e-01      |
| ms_nf    | 1.076e+05  | 2.068e+01 | 1.462e-01 | 1.505e-01      |
| orb_c    | 8.732e-01  | 5.513e-02 | 3.898e-04 | 1.693e-03      |
| orb_f    | 9.504e-01  | 5.653e-02 | 3.997e-04 | 1.756e-03      |
| orm_c    | 9.600e-01  | 2.888e-01 | 2.042e-03 | 3.876e-02      |
| orm_f    | 1.274e+00  | 4.014e-01 | 2.838e-03 | 6.203e-02      |

2. Quantiles for each variable:

|          | 2.5%       | 25%        | 50%        | 75%       | 97.5%     |
|----------|------------|------------|------------|-----------|-----------|
| bs_c     | 1.017e+05  | 1.021e+05  | 1.024e+05  | 1.026e+05 | 1.030e+05 |
| bs_f     | 1.009e+05  | 1.014e+05  | 1.017e+05  | 1.019e+05 | 1.023e+05 |
| bs_nc    | 1.014e+05  | 1.015e+05  | 1.016e+05  | 1.016e+05 | 1.017e+05 |
| bs_nf    | 1.012e+05  | 1.013e+05  | 1.013e+05  | 1.014e+05 | 1.015e+05 |
| d_c      | 8.538e+03  | 4.854e+04  | 6.815e+04  | 8.709e+04 | 1.212e+05 |
| d_f      | -4.273e+04 | 1.053e+02  | 2.127e+04  | 4.210e+04 | 7.953e+04 |
| db_c     | 7.855e+03  | 4.836e+04  | 6.734e+04  | 8.554e+04 | 1.193e+05 |
| db_f     | -3.475e+04 | 6.991e+03  | 2.773e+04  | 4.768e+04 | 8.403e+04 |
| deviance | 5.006e+02  | 5.049e+02  | 5.084e+02  | 5.127e+02 | 5.270e+02 |
| dm_c     | -1.282e+04 | -3.169e+03 | 2.236e+03  | 5.369e+03 | 1.112e+04 |
| dm_f     | -2.688e+04 | -1.192e+04 | -5.221e+03 | 6.142e+02 | 9.104e+03 |
| lb_c     | 9.134e+01  | 5.623e+02  | 7.831e+02  | 9.946e+02 | 1.387e+03 |
| lb_f     | -4.040e+02 | 8.129e+01  | 3.225e+02  | 5.544e+02 | 9.771e+02 |
| lm_c     | -2.406e+02 | -5.948e+01 | 4.197e+01  | 1.008e+02 | 2.088e+02 |
| lm_f     | -5.045e+02 | -2.238e+02 | -9.801e+01 | 1.153e+01 | 1.709e+02 |
| ms_c     | 1.073e+05  | 1.075e+05  | 1.076e+05  | 1.077e+05 | 1.078e+05 |
| ms_f     | 1.071e+05  | 1.073e+05  | 1.075e+05  | 1.076e+05 | 1.077e+05 |
| ms_nc    | 1.075e+05  | 1.076e+05  | 1.076e+05  | 1.076e+05 | 1.076e+05 |
| ms_nf    | 1.075e+05  | 1.076e+05  | 1.076e+05  | 1.076e+05 | 1.076e+05 |
| orb_c    | 7.734e-01  | 8.367e-01  | 8.712e-01  | 9.074e-01 | 9.849e-01 |
| orb_f    | 8.455e-01  | 9.119e-01  | 9.486e-01  | 9.870e-01 | 1.065e+00 |
| orm_c    | 4.908e-01  | 7.555e-01  | 8.975e-01  | 1.144e+00 | 1.588e+00 |
| orm_f    | 5.958e-01  | 9.728e-01  | 1.231e+00  | 1.531e+00 | 2.195e+00 |

quartz  
2

Cost-effectiveness analysis summary

Reference intervention: Community Intervention  
Comparator intervention: do nothing

Optimal decision: choose do nothing for  $k < 80$  and Community Intervention for  $k \geq 80$

Analysis for willingness to pay parameter  $k = 780$

|                        |                  |
|------------------------|------------------|
|                        | Expected utility |
| do nothing             | 11284324399      |
| Community Intervention | 11331468318      |

|                                      |          |         |        |
|--------------------------------------|----------|---------|--------|
|                                      | EIB      | CEAC    | ICER   |
| Community Intervention vs do nothing | 47143920 | 0.97835 | 79.479 |

Optimal intervention (max expected utility) for  $k=780$ : Community Intervention

EVPI 285672  
quartz  
2

Cost-effectiveness analysis summary

Reference intervention: Facility Intervention  
Comparator intervention: do nothing

Optimal decision: choose do nothing for  $k < 270$  and Facility Intervention for  $k \geq 270$

Analysis for willingness to pay parameter  $k = 780$

|                       |                  |
|-----------------------|------------------|
|                       | Expected utility |
| do nothing            | 11266956465      |
| Facility Intervention | 11277522922      |

|                                     |          |         |        |
|-------------------------------------|----------|---------|--------|
|                                     | EIB      | CEAC    | ICER   |
| Facility Intervention vs do nothing | 10566457 | 0.67495 | 269.94 |

Optimal intervention (max expected utility) for  $k=780$ : Facility Intervention

EVPI 5440834  
quartz  
2

Cost-effectiveness analysis summary

Reference intervention: Community Intervention  
Comparator intervention: Facility Intervention

Community Intervention dominates for all  $k$  in  $[0 - 2500]$

Analysis for willingness to pay parameter  $k = 780$

|                        |                  |
|------------------------|------------------|
|                        | Expected utility |
| Community Intervention | 11331468318      |
| Facility Intervention  | 11277522922      |

|                                                 |          |         |         |
|-------------------------------------------------|----------|---------|---------|
|                                                 | EIB      | CEAC    | ICER    |
| Community Intervention vs Facility Intervention | 53945396 | 0.94415 | -3.5356 |

Optimal intervention (max expected utility) for  $k=780$ : Community Intervention

EVPI 903141

Initializing model

Inference for Bugs model at "/Users/timothycolbourn/Documents/Papers/MaiKhanda CEA paper/JAGS revised/MKmodelFC\_final.txt", fit using jags,  
2 chains, each with 21000 iterations (first 1000 discarded), n.thin = 2  
n.sims = 20000 iterations saved

|        | mu.vect   | sd.vect   | 2.5%       | 50%       | 97.5%     | Rhat  | n.eff |
|--------|-----------|-----------|------------|-----------|-----------|-------|-------|
| bs_con | 50862.986 | 54.260    | 50756.000  | 50863.000 | 50970.000 | 1.001 | 20000 |
| bs_fc  | 51342.036 | 224.311   | 50894.180  | 51349.031 | 51754.583 | 1.001 | 20000 |
| d_fc   | 38986.900 | 20133.229 | -1761.312  | 39646.226 | 75428.855 | 1.008 | 5700  |
| db_fc  | 41198.284 | 18868.364 | 3537.467   | 41636.420 | 75926.881 | 1.001 | 15000 |
| dm_fc  | -2211.385 | 6632.355  | -19802.372 | -792.271  | 6448.254  | 1.083 | 250   |
| lb_fc  | 479.050   | 219.400   | 41.133     | 484.144   | 882.871   | 1.001 | 15000 |
| lm_fc  | -41.513   | 124.505   | -371.736   | -14.873   | 121.049   | 1.083 | 250   |
| ms_con | 53782.142 | 14.881    | 53753.000  | 53782.000 | 53811.000 | 1.001 | 20000 |
| ms_fc  | 53740.629 | 125.852   | 53409.374  | 53767.722 | 53904.154 | 1.081 | 260   |

|          |         |         |         |         |         |       |       |
|----------|---------|---------|---------|---------|---------|-------|-------|
| orb_fc   | 0.840   | 0.073   | 0.706   | 0.838   | 0.986   | 1.001 | 12000 |
| orm_fc   | 1.192   | 0.575   | 0.447   | 1.069   | 2.739   | 1.032 | 20000 |
| deviance | 274.238 | 684.960 | 251.663 | 258.148 | 271.404 | 1.005 | 19000 |

For each parameter, n.eff is a crude measure of effective sample size, and Rhat is the potential scale reduction factor (at convergence, Rhat=1).

DIC info (using the rule,  $pD = \text{var}(\text{deviance})/2$ )  
 $pD = 234593.1$  and  $DIC = 234867.4$   
 DIC is an estimate of expected predictive error (lower deviance is better).  
 [[1]]

Quantile (q) = 0.025  
 Accuracy (r) = +/- 0.005  
 Probability (s) = 0.95

|          | Burn-in (M) | Total (N) | Lower bound (Nmin) | Dependence factor (I) |
|----------|-------------|-----------|--------------------|-----------------------|
| bs_con   | 4           | 7604      | 3746               | 2.03                  |
| bs_fc    | 40          | 49416     | 3746               | 13.20                 |
| d_fc     | 48          | 50352     | 3746               | 13.40                 |
| db_fc    | 36          | 41876     | 3746               | 11.20                 |
| deviance | 72          | 73504     | 3746               | 19.60                 |
| dm_fc    | 260         | 237692    | 3746               | 63.50                 |
| lb_fc    | 36          | 41876     | 3746               | 11.20                 |
| lm_fc    | 260         | 237692    | 3746               | 63.50                 |
| ms_con   | 4           | 8630      | 3746               | 2.30                  |
| ms_fc    | 280         | 316940    | 3746               | 84.60                 |
| orb_fc   | 56          | 59904     | 3746               | 16.00                 |
| orm_fc   | 264         | 293670    | 3746               | 78.40                 |

[[2]]

Quantile (q) = 0.025  
 Accuracy (r) = +/- 0.005  
 Probability (s) = 0.95

|          | Burn-in (M) | Total (N) | Lower bound (Nmin) | Dependence factor (I) |
|----------|-------------|-----------|--------------------|-----------------------|
| bs_con   | 2           | 7800      | 3746               | 2.08                  |
| bs_fc    | 28          | 29976     | 3746               | 8.00                  |
| d_fc     | 36          | 35130     | 3746               | 9.38                  |
| db_fc    | 36          | 36876     | 3746               | 9.84                  |
| deviance | 48          | 65472     | 3746               | 17.50                 |
| dm_fc    | 352         | 433598    | 3746               | 116.00                |
| lb_fc    | 36          | 36876     | 3746               | 9.84                  |
| lm_fc    | 352         | 433598    | 3746               | 116.00                |
| ms_con   | 4           | 8078      | 3746               | 2.16                  |
| ms_fc    | 308         | 380842    | 3746               | 102.00                |
| orb_fc   | 48          | 53016     | 3746               | 14.20                 |
| orm_fc   | 224         | 242196    | 3746               | 64.70                 |

Iterations = 1001:20999  
 Thinning interval = 2  
 Number of chains = 2  
 Sample size per chain = 10000

1. Empirical mean and standard deviation for each variable, plus standard error of the mean:

|          | Mean       | SD          | Naive SE    | Time-series SE |
|----------|------------|-------------|-------------|----------------|
| bs_con   | 50862.9863 | 54.25979    | 0.3836746   | 0.383677       |
| bs_fc    | 51342.0361 | 224.31077   | 1.5861167   | 6.687838       |
| d_fc     | 38986.8997 | 20133.22916 | 142.3634287 | 733.900825     |
| db_fc    | 41198.2844 | 18868.36368 | 133.4194791 | 575.676426     |
| deviance | 274.2380   | 684.95976   | 4.8433969   | 9.588212       |
| dm_fc    | -2211.3847 | 6632.35549  | 46.8978354  | 1037.517544    |
| lb_fc    | 479.0498   | 219.39958   | 1.5513893   | 6.693912       |
| lm_fc    | -41.5128   | 124.50451   | 0.8803799   | 19.476582      |
| ms_con   | 53782.1420 | 14.88095    | 0.1052242   | 0.105225       |
| ms_fc    | 53740.6292 | 125.85151   | 0.8899046   | 19.973687      |
| orb_fc   | 0.8397     | 0.07318     | 0.0005175   | 0.002215       |
| orm_fc   | 1.1925     | 0.57523     | 0.0040675   | 0.092813       |

2. Quantiles for each variable:

|        | 2.5%       | 25%        | 50%        | 75%        | 97.5%      |
|--------|------------|------------|------------|------------|------------|
| bs_con | 50756.0000 | 50827.0000 | 50863.0000 | 50899.0000 | 50970.0000 |
| bs_fc  | 50894.1796 | 51200.1761 | 51349.0309 | 51491.9897 | 51754.5831 |
| d_fc   | -1761.3122 | 26414.6354 | 39646.2265 | 52536.0328 | 75428.8549 |
| db_fc  | 3537.4673  | 29204.5867 | 41636.4200 | 53689.1623 | 75926.8810 |

|          |             |            |            |            |            |
|----------|-------------|------------|------------|------------|------------|
| deviance | 251.6627    | 255.3545   | 258.1476   | 261.4310   | 271.4043   |
| dm_fc    | -19802.3720 | -5638.2032 | -792.2708  | 2558.6247  | 6448.2542  |
| lb_fc    | 41.1333     | 339.5882   | 484.1444   | 624.2926   | 882.8707   |
| lm_fc    | -371.7359   | -105.8420  | -14.8727   | 48.0313    | 121.0485   |
| ms_con   | 53753.0000  | 53772.0000 | 53782.0000 | 53792.0000 | 53811.0000 |
| ms_fc    | 53409.3744  | 53675.9711 | 53767.7223 | 53831.4781 | 53904.1537 |
| orb_fc   | 0.7063      | 0.7910     | 0.8377     | 0.8857     | 0.9862     |
| orm_fc   | 0.4472      | 0.7775     | 1.0689     | 1.4901     | 2.7391     |

quartz  
2

Cost-effectiveness analysis summary

Reference intervention: Facility & Community Interventions  
Comparator intervention: do nothing

Optimal decision: choose do nothing for k<145 and Facility & Community Interventions for k>=145

Analysis for willingness to pay parameter k = 780

|                                    |                  |
|------------------------------------|------------------|
|                                    | Expected utility |
| do nothing                         | 5646569387       |
| Facility & Community Interventions | 5671508668       |

|                                                  |          |         |        |
|--------------------------------------------------|----------|---------|--------|
|                                                  | EIB      | CEAC    | ICER   |
| Facility & Community Interventions vs do nothing | 24939281 | 0.94225 | 140.32 |

Optimal intervention (max expected utility) for k=780: Facility & Community Interventions

EVPI 488886  
quartz  
2

Cost-effectiveness analysis summary

Reference intervention: Community Intervention  
Comparator intervention(s): Facility Intervention  
: FICI

Optimal decision: choose Community Intervention for k<255 and FICI for k>=255

Analysis for willingness to pay parameter k = 780

|                        |                  |
|------------------------|------------------|
|                        | Expected utility |
| Community Intervention | 11331468318      |
| Facility Intervention  | 11277522922      |
| FICI                   | 11343017336      |

|                                                 |           |         |          |
|-------------------------------------------------|-----------|---------|----------|
|                                                 | EIB       | CEAC    | ICER     |
| Community Intervention vs Facility Intervention | 53945396  | 0.94415 | -3.5356  |
| Community Intervention vs FICI                  | -11549017 | 0.37850 | 254.4698 |

Optimal intervention (max expected utility) for k=780: FICI

EVPI 10716765  
quartz  
2

[1] "time horizon in years"  
[1] 5  
[1] "cost discount rate"  
[1] 0.03  
[1] "effects discount rate"  
[1] 0

Cost-effectiveness analysis summary

Reference intervention: Community Intervention  
Comparator intervention(s): Facility Intervention  
: FICI

Optimal decision: choose Community Intervention for k<230 and FICI for k>=230

Analysis for willingness to pay parameter k = 780

|                        |                  |
|------------------------|------------------|
|                        | Expected utility |
| Community Intervention | 31506755790      |
| Facility Intervention  | 313568285502     |
| FICI                   | 315406426918     |

|  |     |      |      |
|--|-----|------|------|
|  | EIB | CEAC | ICER |
|--|-----|------|------|

Community Intervention vs Facility Intervention 1499272288 0.99875 -3.2331  
Community Intervention vs FICI -338869127 0.24650 225.3860

Optimal intervention (max expected utility) for k=780: FICI

EVPI 72244693

quartz

2

[1] "time horizon in years"

[1] 5

[1] "cost discount rate"

[1] 0

[1] "effects discount rate"

[1] 0

Cost-effectiveness analysis summary

Reference intervention: Community Intervention

Comparator intervention(s): Facility Intervention

: FICI

Optimal decision: choose Community Intervention for k<250 and FICI for k>=250

Analysis for willingness to pay parameter k = 780

|                        | Expected utility |
|------------------------|------------------|
| Community Intervention | 315055903400     |
| Facility Intervention  | 313556064029     |
| FICI                   | 315382551054     |

|                                                 | EIB        | CEAC    | ICER     |
|-------------------------------------------------|------------|---------|----------|
| Community Intervention vs Facility Intervention | 1499839371 | 0.99875 | -3.5294  |
| Community Intervention vs FICI                  | -326647654 | 0.25400 | 245.3884 |

Optimal intervention (max expected utility) for k=780: FICI

EVPI 75301091

quartz

2

[1] "time horizon in years"

[1] 5

[1] "cost discount rate"

[1] 0.1

[1] "effects discount rate"

[1] 0

Cost-effectiveness analysis summary

Reference intervention: Community Intervention

Comparator intervention(s): Facility Intervention

: FICI

Optimal decision: choose Community Intervention for k<190 and FICI for k>=190

Analysis for willingness to pay parameter k = 780

|                        | Expected utility |
|------------------------|------------------|
| Community Intervention | 315089433936     |
| Facility Intervention  | 313591226103     |
| FICI                   | 315451243664     |

|                                                 | EIB        | CEAC    | ICER     |
|-------------------------------------------------|------------|---------|----------|
| Community Intervention vs Facility Intervention | 1498207833 | 0.99875 | -2.6771  |
| Community Intervention vs FICI                  | -361809728 | 0.23225 | 187.8400 |

Optimal intervention (max expected utility) for k=780: FICI

EVPI 66762106

quartz

2

[1] "time horizon in years"

[1] 5

[1] "cost discount rate"

[1] 0.03

[1] "effects discount rate"

[1] 0.02

Cost-effectiveness analysis summary

Reference intervention: Community Intervention

Comparator intervention(s): Facility Intervention

: FICI

Optimal decision: choose Community Intervention for  $k < 240$  and FICI for  $k \geq 240$

Analysis for willingness to pay parameter  $k = 780$

|                                                 | Expected utility |         |          |      |
|-------------------------------------------------|------------------|---------|----------|------|
| Community Intervention                          | 297004097950     |         |          |      |
| Facility Intervention                           | 295590391430     |         |          |      |
| FICI                                            | 297315655188     |         |          |      |
|                                                 |                  | EIB     | CEAC     | ICER |
| Community Intervention vs Facility Intervention | 1413706520       | 0.99875 | -3.4297  |      |
| Community Intervention vs FICI                  | -311557239       | 0.25155 | 239.0876 |      |

Optimal intervention (max expected utility) for  $k=780$ : FICI

EVPI 70073716  
quartz  
2  
[1] "time horizon in years"  
[1] 5  
[1] "cost discount rate"  
[1] 0  
[1] "effects discount rate"  
[1] 0.02

Cost-effectiveness analysis summary

Reference intervention: Community Intervention  
Comparator intervention(s): Facility Intervention  
: FICI

Optimal decision: choose Community Intervention for  $k < 265$  and FICI for  $k \geq 265$

Analysis for willingness to pay parameter  $k = 780$

|                                                 | Expected utility |         |         |      |
|-------------------------------------------------|------------------|---------|---------|------|
| Community Intervention                          | 296992443559     |         |         |      |
| Facility Intervention                           | 295578169957     |         |         |      |
| FICI                                            | 297291779325     |         |         |      |
|                                                 |                  | EIB     | CEAC    | ICER |
| Community Intervention vs Facility Intervention | 1414273602       | 0.99875 | -3.744  |      |
| Community Intervention vs FICI                  | -299335766       | 0.25865 | 260.306 |      |

Optimal intervention (max expected utility) for  $k=780$ : FICI

EVPI 73193910  
quartz  
2  
[1] "time horizon in years"  
[1] 5  
[1] "cost discount rate"  
[1] 0.1  
[1] "effects discount rate"  
[1] 0.02

Cost-effectiveness analysis summary

Reference intervention: Community Intervention  
Comparator intervention(s): Facility Intervention  
: FICI

Optimal decision: choose Community Intervention for  $k < 200$  and FICI for  $k \geq 200$

Analysis for willingness to pay parameter  $k = 780$

|                                                 | Expected utility |         |          |      |
|-------------------------------------------------|------------------|---------|----------|------|
| Community Intervention                          | 297025974095     |         |          |      |
| Facility Intervention                           | 295613332031     |         |          |      |
| FICI                                            | 297360471934     |         |          |      |
|                                                 |                  | EIB     | CEAC     | ICER |
| Community Intervention vs Facility Intervention | 1412642064       | 0.99875 | -2.8398  |      |
| Community Intervention vs FICI                  | -334497839       | 0.23610 | 199.2591 |      |

Optimal intervention (max expected utility) for  $k=780$ : FICI

EVPI 64479001  
quartz  
2



```
[1] "time horizon in years"
[1] 5
[1] "cost discount rate"
[1] 0.03
[1] "effects discount rate"
[1] 0.03
```

Cost-effectiveness analysis summary

```
Reference intervention: Community Intervention
Comparator intervention(s): Facility Intervention
                        : FICI
```

Optimal decision: choose Community Intervention for  $k < 250$  and FICI for  $k \geq 250$

Analysis for willingness to pay parameter  $k = 780$

```
                Expected utility
Community Intervention  288572376234
Facility Intervention  287198610388
FICI                   288871184738
```

```
                EIB    CEAC    ICER
Community Intervention vs Facility Intervention 1373765846 0.99875 -3.5299
Community Intervention vs FICI                 -298808504 0.25405 246.0703
```

Optimal intervention (max expected utility) for  $k=780$ : FICI

EVPI 69079152

quartz

2

```
[1] "time horizon in years"
[1] 5
[1] "cost discount rate"
[1] 0
[1] "effects discount rate"
[1] 0.03
```

Cost-effectiveness analysis summary

```
Reference intervention: Community Intervention
Comparator intervention(s): Facility Intervention
                        : FICI
```

Optimal decision: choose Community Intervention for  $k < 270$  and FICI for  $k \geq 270$

Analysis for willingness to pay parameter  $k = 780$

```
                Expected utility
Community Intervention  288560721843
Facility Intervention  287186388915
FICI                   288847308875
```

```
                EIB    CEAC    ICER
Community Intervention vs Facility Intervention 1374332929 0.99875 -3.8533
Community Intervention vs FICI                 -286587031 0.26200 267.9084
```

Optimal intervention (max expected utility) for  $k=780$ : FICI

EVPI 72231344

quartz

2

```
[1] "time horizon in years"
[1] 5
[1] "cost discount rate"
[1] 0.1
[1] "effects discount rate"
[1] 0.03
```

Cost-effectiveness analysis summary

```
Reference intervention: Community Intervention
Comparator intervention(s): Facility Intervention
                        : FICI
```

Optimal decision: choose Community Intervention for  $k < 210$  and FICI for  $k \geq 210$

Analysis for willingness to pay parameter  $k = 780$

```
                Expected utility
Community Intervention  288594252379
```

|                                                 |              |         |          |      |
|-------------------------------------------------|--------------|---------|----------|------|
| Facility Intervention                           | 287221550988 |         |          |      |
| FICI                                            | 288916001484 |         |          |      |
|                                                 |              | EIB     | CEAC     | ICER |
| Community Intervention vs Facility Intervention | 1372701391   | 0.99875 | -2.9227  |      |
| Community Intervention vs FICI                  | -321749105   | 0.23855 | 205.0786 |      |

Optimal intervention (max expected utility) for k=780: FICI

EVPI 63426113  
quartz  
2  
[1] "time horizon in years"  
[1] 10  
[1] "cost discount rate"  
[1] 0.03  
[1] "effects discount rate"  
[1] 0

Cost-effectiveness analysis summary

Reference intervention: Community Intervention  
Comparator intervention(s): Facility Intervention  
: FICI

Optimal decision: choose Community Intervention for k<210 and FICI for k>=210

Analysis for willingness to pay parameter k = 780

|                                                 |                  |        |          |      |
|-------------------------------------------------|------------------|--------|----------|------|
|                                                 | Expected utility |        |          |      |
| Community Intervention                          | 630157093293     |        |          |      |
| Facility Intervention                           | 627159407405     |        |          |      |
| FICI                                            | 630857667962     |        |          |      |
|                                                 |                  | EIB    | CEAC     | ICER |
| Community Intervention vs Facility Intervention | 2997685888       | 0.9990 | -3.0089  |      |
| Community Intervention vs FICI                  | -700574669       | 0.1505 | 206.6982 |      |

Optimal intervention (max expected utility) for k=780: FICI

EVPI 59381827  
quartz  
2  
[1] "time horizon in years"  
[1] 10  
[1] "cost discount rate"  
[1] 0  
[1] "effects discount rate"  
[1] 0

Cost-effectiveness analysis summary

Reference intervention: Community Intervention  
Comparator intervention(s): Facility Intervention  
: FICI

Optimal decision: choose Community Intervention for k<245 and FICI for k>=245

Analysis for willingness to pay parameter k = 780

|                                                 |                  |       |          |      |
|-------------------------------------------------|------------------|-------|----------|------|
|                                                 | Expected utility |       |          |      |
| Community Intervention                          | 630116336969     |       |          |      |
| Facility Intervention                           | 627116667949     |       |          |      |
| FICI                                            | 630774172181     |       |          |      |
|                                                 |                  | EIB   | CEAC     | ICER |
| Community Intervention vs Facility Intervention | 2999669020       | 0.999 | -3.5269  |      |
| Community Intervention vs FICI                  | -657835212       | 0.166 | 241.6732 |      |

Optimal intervention (max expected utility) for k=780: FICI

EVPI 66144334  
quartz  
2  
[1] "time horizon in years"  
[1] 10  
[1] "cost discount rate"  
[1] 0.1  
[1] "effects discount rate"  
[1] 0

Cost-effectiveness analysis summary

Reference intervention: Community Intervention  
Comparator intervention(s): Facility Intervention  
: FICI

Optimal decision: choose Community Intervention for k<150 and FICI for k>=150

Analysis for willingness to pay parameter k = 780

|                        | Expected utility |
|------------------------|------------------|
| Community Intervention | 630223245104     |
| Facility Intervention  | 627228778048     |
| FICI                   | 630993190415     |

|                                                 | EIB        | CEAC  | ICER     |
|-------------------------------------------------|------------|-------|----------|
| Community Intervention vs Facility Intervention | 2994467055 | 0.999 | -2.1681  |
| Community Intervention vs FICI                  | -769945312 | 0.129 | 149.9301 |

Optimal intervention (max expected utility) for k=780: FICI

EVPI 49814291

quartz

2

[1] "time horizon in years"

[1] 10

[1] "cost discount rate"

[1] 0.03

[1] "effects discount rate"

[1] 0.02

Cost-effectiveness analysis summary

Reference intervention: Community Intervention  
Comparator intervention(s): Facility Intervention  
: FICI

Optimal decision: choose Community Intervention for k<235 and FICI for k>=235

Analysis for willingness to pay parameter k = 780

|                        | Expected utility |
|------------------------|------------------|
| Community Intervention | 566019439361     |
| Facility Intervention  | 563325570555     |
| FICI                   | 566623038119     |

|                                                 | EIB        | CEAC   | ICER     |
|-------------------------------------------------|------------|--------|----------|
| Community Intervention vs Facility Intervention | 2693868806 | 0.9990 | -3.3497  |
| Community Intervention vs FICI                  | -603598757 | 0.1613 | 230.1099 |

Optimal intervention (max expected utility) for k=780: FICI

EVPI 57375378

quartz

2

[1] "time horizon in years"

[1] 10

[1] "cost discount rate"

[1] 0

[1] "effects discount rate"

[1] 0.02

Cost-effectiveness analysis summary

Reference intervention: Community Intervention  
Comparator intervention(s): Facility Intervention  
: FICI

Optimal decision: choose Community Intervention for k<270 and FICI for k>=270

Analysis for willingness to pay parameter k = 780

|                        | Expected utility |
|------------------------|------------------|
| Community Intervention | 565978683037     |
| Facility Intervention  | 563282831099     |
| FICI                   | 566539542338     |

|                                                 | EIB        | CEAC   | ICER     |
|-------------------------------------------------|------------|--------|----------|
| Community Intervention vs Facility Intervention | 2695851938 | 0.9990 | -3.9263  |
| Community Intervention vs FICI                  | -560859301 | 0.1781 | 269.0464 |

Optimal intervention (max expected utility) for k=780: FICI

EVPI 64640722

quartz

2

[1] "time horizon in years"

[1] 10

[1] "cost discount rate"

[1] 0.1

[1] "effects discount rate"

[1] 0.02

Cost-effectiveness analysis summary

Reference intervention: Community Intervention

Comparator intervention(s): Facility Intervention  
: FICI

Optimal decision: choose Community Intervention for  $k < 170$  and FICI for  $k \geq 170$

Analysis for willingness to pay parameter  $k = 780$

|                        | Expected utility |
|------------------------|------------------|
| Community Intervention | 566085591172     |
| Facility Intervention  | 563394941198     |
| FICI                   | 566758560572     |

|                                                 | EIB        | CEAC    | ICER     |
|-------------------------------------------------|------------|---------|----------|
| Community Intervention vs Facility Intervention | 2690649974 | 0.99900 | -2.4136  |
| Community Intervention vs FICI                  | -672969400 | 0.13335 | 166.9120 |

Optimal intervention (max expected utility) for  $k=780$ : FICI

EVPI 47200900

quartz

2

[1] "time horizon in years"

[1] 10

[1] "cost discount rate"

[1] 0.03

[1] "effects discount rate"

[1] 0.03

Cost-effectiveness analysis summary

Reference intervention: Community Intervention

Comparator intervention(s): Facility Intervention  
: FICI

Optimal decision: choose Community Intervention for  $k < 245$  and FICI for  $k \geq 245$

Analysis for willingness to pay parameter  $k = 780$

|                        | Expected utility |
|------------------------|------------------|
| Community Intervention | 537501350668     |
| Facility Intervention  | 534942570721     |
| FICI                   | 538061830174     |

|                                                 | EIB        | CEAC    | ICER     |
|-------------------------------------------------|------------|---------|----------|
| Community Intervention vs Facility Intervention | 2558779947 | 0.99900 | -3.5273  |
| Community Intervention vs FICI                  | -560479506 | 0.16695 | 242.3134 |

Optimal intervention (max expected utility) for  $k=780$ : FICI

EVPI 56627976

quartz

2

[1] "time horizon in years"

[1] 10

[1] "cost discount rate"

[1] 0

[1] "effects discount rate"

[1] 0.03

Cost-effectiveness analysis summary

Reference intervention: Community Intervention

Comparator intervention(s): Facility Intervention  
: FICI

Optimal decision: choose Community Intervention for  $k < 285$  and FICI for  $k \geq 285$

Analysis for willingness to pay parameter k = 780

|                        | Expected utility |
|------------------------|------------------|
| Community Intervention | 537460594344     |
| Facility Intervention  | 534899831264     |
| FICI                   | 537978334393     |

|                                                 | EIB        | CEAC   | ICER     |
|-------------------------------------------------|------------|--------|----------|
| Community Intervention vs Facility Intervention | 2560763079 | 0.9990 | -4.1345  |
| Community Intervention vs FICI                  | -517740049 | 0.1855 | 283.3147 |

Optimal intervention (max expected utility) for k=780: FICI

EVPI 64158023

quartz

2

[1] "time horizon in years"

[1] 10

[1] "cost discount rate"

[1] 0.1

[1] "effects discount rate"

[1] 0.03

Cost-effectiveness analysis summary

Reference intervention: Community Intervention

Comparator intervention(s): Facility Intervention  
: FICI

Optimal decision: choose Community Intervention for k<180 and FICI for k>=180

Analysis for willingness to pay parameter k = 780

|                        | Expected utility |
|------------------------|------------------|
| Community Intervention | 537567502478     |
| Facility Intervention  | 535011941364     |
| FICI                   | 538197352627     |

|                                                 | EIB        | CEAC    | ICER     |
|-------------------------------------------------|------------|---------|----------|
| Community Intervention vs Facility Intervention | 2555561115 | 0.99900 | -2.5416  |
| Community Intervention vs FICI                  | -629850149 | 0.13725 | 175.7638 |

Optimal intervention (max expected utility) for k=780: FICI

EVPI 46091319

quartz

2

[1] "time horizon in years"

[1] 20

[1] "cost discount rate"

[1] 0.03

[1] "effects discount rate"

[1] 0

Cost-effectiveness analysis summary

Reference intervention: Community Intervention

Comparator intervention(s): Facility Intervention  
: FICI

Optimal decision: choose Community Intervention for k<180 and FICI for k>=180

Analysis for willingness to pay parameter k = 780

|                        | Expected utility |
|------------------------|------------------|
| Community Intervention | 1260379247717    |
| Facility Intervention  | 1254386830995    |
| FICI                   | 1261848413252    |

|                                                 | EIB         | CEAC | ICER     |
|-------------------------------------------------|-------------|------|----------|
| Community Intervention vs Facility Intervention | 5992416723  | 1.00 | -2.6229  |
| Community Intervention vs FICI                  | -1469165534 | 0.07 | 178.8683 |

Optimal intervention (max expected utility) for k=780: FICI

EVPI 39332414

quartz

2

[1] "time horizon in years"

[1] 20

[1] "cost discount rate"

[1] 0

[1] "effects discount rate"  
[1] 0

Cost-effectiveness analysis summary

Reference intervention: Community Intervention  
Comparator intervention(s): Facility Intervention  
: FICI

Optimal decision: choose Community Intervention for  $k < 240$  and FICI for  $k \geq 240$

Analysis for willingness to pay parameter  $k = 780$

|                        | Expected utility |
|------------------------|------------------|
| Community Intervention | 1260237204107    |
| Facility Intervention  | 1254237875788    |
| FICI                   | 1261557414435    |

|                                                 | EIB         | CEAC  | ICER     |
|-------------------------------------------------|-------------|-------|----------|
| Community Intervention vs Facility Intervention | 5999328319  | 1.000 | -3.5256  |
| Community Intervention vs FICI                  | -1320210328 | 0.093 | 239.8157 |

Optimal intervention (max expected utility) for  $k=780$ : FICI

EVPI 51683524

quartz

2

[1] "time horizon in years"  
[1] 20  
[1] "cost discount rate"  
[1] 0.1  
[1] "effects discount rate"  
[1] 0

Cost-effectiveness analysis summary

Reference intervention: Community Intervention  
Comparator intervention(s): Facility Intervention  
: FICI

Optimal decision: choose Community Intervention for  $k < 105$  and FICI for  $k \geq 105$

Analysis for willingness to pay parameter  $k = 780$

|                        | Expected utility |
|------------------------|------------------|
| Community Intervention | 1260555713989    |
| Facility Intervention  | 1254571883810    |
| FICI                   | 1262209932339    |

|                                                 | EIB         | CEAC  | ICER     |
|-------------------------------------------------|-------------|-------|----------|
| Community Intervention vs Facility Intervention | 5983830180  | 1.000 | -1.5015  |
| Community Intervention vs FICI                  | -1654218349 | 0.051 | 103.1511 |

Optimal intervention (max expected utility) for  $k=780$ : FICI

EVPI 28034329

quartz

2

[1] "time horizon in years"  
[1] 20  
[1] "cost discount rate"  
[1] 0.03  
[1] "effects discount rate"  
[1] 0.02

Cost-effectiveness analysis summary

Reference intervention: Community Intervention  
Comparator intervention(s): Facility Intervention  
: FICI

Optimal decision: choose Community Intervention for  $k < 220$  and FICI for  $k \geq 220$

Analysis for willingness to pay parameter  $k = 780$

|                        | Expected utility |
|------------------------|------------------|
| Community Intervention | 1030374277350    |
| Facility Intervention  | 1025471383468    |
| FICI                   | 1031495676163    |

| EIB | CEAC | ICER |
|-----|------|------|
|-----|------|------|

Community Intervention vs Facility Intervention 4902893883 1.00000 -3.2082  
Community Intervention vs FICI -1121398813 0.08695 218.7800

Optimal intervention (max expected utility) for k=780: FICI

EVPI 38677596

quartz

2

[1] "time horizon in years"

[1] 20

[1] "cost discount rate"

[1] 0

[1] "effects discount rate"

[1] 0.02

Cost-effectiveness analysis summary

Reference intervention: Community Intervention

Comparator intervention(s): Facility Intervention  
: FICI

Optimal decision: choose Community Intervention for k<295 and FICI for k>=295

Analysis for willingness to pay parameter k = 780

|                        | Expected utility |
|------------------------|------------------|
| Community Intervention | 1030232233740    |
| Facility Intervention  | 1025322428261    |
| FICI                   | 1031204677347    |

|                                                 | EIB        | CEAC  | ICER     |
|-------------------------------------------------|------------|-------|----------|
| Community Intervention vs Facility Intervention | 4909805479 | 1.000 | -4.3123  |
| Community Intervention vs FICI                  | -972443607 | 0.124 | 293.3268 |

Optimal intervention (max expected utility) for k=780: FICI

EVPI 54215061

quartz

2

[1] "time horizon in years"

[1] 20

[1] "cost discount rate"

[1] 0.1

[1] "effects discount rate"

[1] 0.02

Cost-effectiveness analysis summary

Reference intervention: Community Intervention

Comparator intervention(s): Facility Intervention  
: FICI

Optimal decision: choose Community Intervention for k<130 and FICI for k>=130

Analysis for willingness to pay parameter k = 780

|                        | Expected utility |
|------------------------|------------------|
| Community Intervention | 1030550743622    |
| Facility Intervention  | 1025656436283    |
| FICI                   | 1031857195250    |

|                                                 | EIB         | CEAC    | ICER     |
|-------------------------------------------------|-------------|---------|----------|
| Community Intervention vs Facility Intervention | 4894307339  | 1.00000 | -1.8365  |
| Community Intervention vs FICI                  | -1306451628 | 0.05745 | 126.1677 |

Optimal intervention (max expected utility) for k=780: FICI

EVPI 25450120

quartz

2

[1] "time horizon in years"

[1] 20

[1] "cost discount rate"

[1] 0.03

[1] "effects discount rate"

[1] 0.03

Cost-effectiveness analysis summary

Reference intervention: Community Intervention

Comparator intervention(s): Facility Intervention  
: FICI

Optimal decision: choose Community Intervention for  $k < 245$  and FICI for  $k \geq 245$

Analysis for willingness to pay parameter  $k = 780$

|                                                 | Expected utility |         |         |      |
|-------------------------------------------------|------------------|---------|---------|------|
| Community Intervention                          | 937456205820     |         |         |      |
| Facility Intervention                           | 932993460518     |         |         |      |
| FICI                                            | 938437112830     |         |         |      |
|                                                 |                  | EIB     | CEAC    | ICER |
| Community Intervention vs Facility Intervention | 4462745302       | 1.00000 | -3.526  |      |
| Community Intervention vs FICI                  | -980907010       | 0.09985 | 240.455 |      |

Optimal intervention (max expected utility) for  $k=780$ : FICI

EVPI 39170730

quartz

2

[1] "time horizon in years"

[1] 20

[1] "cost discount rate"

[1] 0

[1] "effects discount rate"

[1] 0.03

Cost-effectiveness analysis summary

Reference intervention: Community Intervention

Comparator intervention(s): Facility Intervention

: FICI

Optimal decision: choose Community Intervention for  $k < 325$  and FICI for  $k \geq 325$

Analysis for willingness to pay parameter  $k = 780$

|                                                 | Expected utility |         |          |      |
|-------------------------------------------------|------------------|---------|----------|------|
| Community Intervention                          | 937314162210     |         |          |      |
| Facility Intervention                           | 932844505312     |         |          |      |
| FICI                                            | 938146114013     |         |          |      |
|                                                 |                  | EIB     | CEAC     | ICER |
| Community Intervention vs Facility Intervention | 4469656898       | 1.00000 | -4.7395  |      |
| Community Intervention vs FICI                  | -831951803       | 0.14235 | 322.3876 |      |

Optimal intervention (max expected utility) for  $k=780$ : FICI

EVPI 57149945

quartz

2

[1] "time horizon in years"

[1] 20

[1] "cost discount rate"

[1] 0.1

[1] "effects discount rate"

[1] 0.03

Cost-effectiveness analysis summary

Reference intervention: Community Intervention

Comparator intervention(s): Facility Intervention

: FICI

Optimal decision: choose Community Intervention for  $k < 140$  and FICI for  $k \geq 140$

Analysis for willingness to pay parameter  $k = 780$

|                                                 | Expected utility |         |          |      |
|-------------------------------------------------|------------------|---------|----------|------|
| Community Intervention                          | 937632672092     |         |          |      |
| Facility Intervention                           | 933178513333     |         |          |      |
| FICI                                            | 938798631917     |         |          |      |
|                                                 |                  | EIB     | CEAC     | ICER |
| Community Intervention vs Facility Intervention | 4454158759       | 1.00000 | -2.0185  |      |
| Community Intervention vs FICI                  | -1165959825      | 0.0615  | 138.6675 |      |

Optimal intervention (max expected utility) for  $k=780$ : FICI

EVPI 24582113
